# Supplementary material for: Metabolomics Analyses Provide Insights Into Nutritional Value and Abiotic Stress Tolerance in Halophyte Halogeton glomeratus
Source: Front Plant Sci. 2021 Jul 5;12:703255. doi: 10.3389/fpls.2021.703255 (PMC8287573; doi:10.3389/fpls.2021.703255)
Supplement: Supplementary Table 4 — Detailed information of KEGG pathway enrichment analysis of differential metabolites in root vs. stem, root vs. leaf, root vs. seed, stem vs. leaf, stem vs. seed and leaf vs. seed comparisons. [file Table_4.XLSX]

## Sheet: Root-vs-Stem
KEGG_A_class	KEGG_B_class	Pathway	Root-vs-Stem (171)	All (1183)	Pvalue	Qvalue	Pathway ID	Metabolites	C_IDs
Metabolism	Global and overview maps	2-Oxocarboxylic acid metabolism	18	48	4.54418e-05	0.00372623	ko01210	POS_M118T703_1;POS_M118T141;POS_M132T212;POS_M132T234;POS_M146T74;POS_M147T76;POS_M148T88;POS_M150T145;POS_M162T97;POS_M166T344;POS_M189T150;NEG_M101T92;NEG_M132T82;NEG_M159T105;NEG_M175T99;NEG_M180T175;NEG_M192T75;NEG_M203T374	C03283+C00183+C00407+C00123+C00026+C00047+C00025+C00073+C00956+C00079+C04002+C00109+C00049+C00322+C02504+C00082+C00158+C00078
Genetic Information Processing	Translation	Aminoacyl-tRNA biosynthesis	11	24	0.000191289	0.00548327	ko00970	POS_M118T141;POS_M132T212;POS_M132T234;POS_M147T76;POS_M148T88;POS_M150T145;POS_M166T344;NEG_M132T82;NEG_M154T94;NEG_M180T175;NEG_M203T374	C00183+C00407+C00123+C00047+C00025+C00073+C00079+C00049+C00135+C00082+C00078
Environmental Information Processing	Membrane transport	ABC transporters	20	62	0.000200607	0.00548327	ko02010	POS_M89T75;POS_M104T101;POS_M118T141;POS_M132T212;POS_M132T234;POS_M147T76;POS_M148T88;POS_M153T228;POS_M163T96;POS_M166T344;POS_M325T96;POS_M425T677;NEG_M132T82;NEG_M149T91;NEG_M154T94;NEG_M180T92;NEG_M323T380;NEG_M341T112;NEG_M342T99;NEG_M342T112	C00134+C00114+C00183+C00407+C00123+C00047+C00025+C00379+C00031+C00079+C00185+C01674+C00049+C00181+C00135+C00137+C00243+C01083+C05402+C00089
Metabolism	Biosynthesis of other secondary metabolites	Glucosinolate biosynthesis	7	14	0.00164321	0.0336857	ko00966	POS_M118T141;POS_M132T212;POS_M132T234;POS_M150T145;POS_M166T344;NEG_M180T175;NEG_M203T374	C00183+C00407+C00123+C00073+C00079+C00082+C00078
Metabolism	Carbohydrate metabolism	Starch and sucrose metabolism	5	9	0.00459804	0.0719009	ko00500	POS_M163T96;POS_M325T96;NEG_M259T100;NEG_M341T112;NEG_M342T112	C00031+C00185+C00092+C01083+C00089
Metabolism	Amino acid metabolism	Alanine, aspartate and glutamate metabolism	9	25	0.00569436	0.0719009	ko00250	POS_M104T90;POS_M146T74;POS_M148T88;POS_M176T146;POS_M259T204;NEG_M132T82;NEG_M192T75;NEG_M289T540;NEG_M303T487	C00334+C00026+C00025+C00438+C00352+C00049+C00158+C03406+C12270
Metabolism	Global and overview maps	Biosynthesis of amino acids	22	90	0.00613788	0.0719009	ko01230	POS_M118T703_1;POS_M118T141;POS_M132T212;POS_M132T234;POS_M146T74;POS_M147T76;POS_M148T88;POS_M150T145;POS_M162T97;POS_M166T344;POS_M172T309;POS_M189T150;POS_M190T309;NEG_M101T92;NEG_M132T82;NEG_M154T94;NEG_M159T105;NEG_M175T99;NEG_M180T175;NEG_M192T75;NEG_M203T374;NEG_M289T540	C03283+C00183+C00407+C00123+C00026+C00047+C00025+C00073+C00956+C00079+C03972+C04002+C03871+C00109+C00049+C00135+C00322+C02504+C00082+C00158+C00078+C03406
Metabolism	Biosynthesis of other secondary metabolites	Phenylpropanoid biosynthesis	12	40	0.00789816	0.0809561	ko00940	POS_M121T289;POS_M135T550_1;POS_M165T208;POS_M166T344;POS_M193T449;POS_M209T660;POS_M342T542;NEG_M177T590;NEG_M180T175;NEG_M191T537;NEG_M193T349;NEG_M312T599	C05627+C16930+C00811+C00079+C02325+C05610+C00761+C12205+C00082+C01752+C01494+C05855
Metabolism	Carbohydrate metabolism	Inositol phosphate metabolism	4	7	0.0103529	0.0943264	ko00562	POS_M161T449;POS_M179T456;NEG_M180T92;NEG_M259T100	C04287+C16737+C00137+C00092
Metabolism	Carbohydrate metabolism	C5-Branched dibasic acid metabolism	6	15	0.0135221	0.110882	ko00660	POS_M146T74;POS_M147T158;POS_M148T73;POS_M148T88;POS_M157T126;NEG_M101T92	C00026+C06030+C02614+C00025+C02341+C00109
Metabolism	Amino acid metabolism	Lysine biosynthesis	8	25	0.0195466	0.145711	ko00300	POS_M146T74;POS_M147T76;POS_M162T97;POS_M172T309;POS_M189T150;POS_M190T309;NEG_M132T82;NEG_M159T105	C00026+C00047+C00956+C03972+C04002+C03871+C00049+C00322
Metabolism	Metabolism of other amino acids	beta-Alanine metabolism	7	21	0.0227768	0.155642	ko00410	POS_M104T90;POS_M113T198;POS_M168T347;NEG_M89T92;NEG_M132T82;NEG_M154T94;NEG_M207T208	C00334+C00106+C03722+C00099+C00049+C00135+C00386
Metabolism	Amino acid metabolism	Histidine metabolism	8	26	0.0248365	0.156661	ko00340	POS_M112T75;POS_M146T74;POS_M148T88;POS_M152T322;POS_M156T74_2;NEG_M132T82;NEG_M154T94;NEG_M207T208	C00388+C00026+C00025+C01152+C03680+C00049+C00135+C00386
Metabolism	Nucleotide metabolism	Purine metabolism	11	42	0.0304178	0.178162	ko00230	POS_M126T345;POS_M137T157;POS_M152T98_1;POS_M268T275;POS_M284T298;POS_M330T190;POS_M346T234;POS_M348T270;POS_M364T179;NEG_M134T293;NEG_M331T473	C04051+C00262+C00242+C00212+C00387+C00575+C06194+C00020+C06193+C00147+C06196
Metabolism	Metabolism of other amino acids	Cyanoamino acid metabolism	6	19	0.0445702	0.24365	ko00460	POS_M118T141;POS_M132T212;POS_M166T344;NEG_M89T79_1;NEG_M132T82;NEG_M180T175	C00183+C00407+C00079+C01401+C00049+C00082
Metabolism	Biosynthesis of other secondary metabolites	Flavone and flavonol biosynthesis	7	25	0.0568987	0.287678	ko00944	POS_M301T508;POS_M465T506;POS_M565T478_2;POS_M611T491_2;NEG_M299T723;NEG_M315T659;NEG_M431T492_1	C10107+C05623+C04858+C05625+C10098+C04443+C01714
Metabolism	Biosynthesis of other secondary metabolites	Indole alkaloid biosynthesis	4	11	0.0610259	0.287678	ko00901	POS_M163T96;POS_M810T814_1;NEG_M203T374;NEG_M805T592	C00031+C07201+C00078+C07204
Metabolism	Biosynthesis of other secondary metabolites	Betalain biosynthesis	3	7	0.0666355	0.287678	ko00965	POS_M168T322;POS_M195T354;NEG_M180T175	C05587+C05604+C00082
Metabolism	Amino acid metabolism	Lysine degradation	7	26	0.0687111	0.287678	ko00310	POS_M85T96;POS_M130T86;POS_M147T76;POS_M159T399;POS_M162T97;POS_M219T357;NEG_M159T105	C00164+C00408+C00047+C03087+C00956+C04020+C00322
Metabolism	Nucleotide metabolism	Pyrimidine metabolism	9	37	0.0735555	0.287678	ko00240	POS_M112T98;POS_M113T198;POS_M128T74;POS_M142T74_1;POS_M176T146;POS_M244T98;POS_M324T142;NEG_M89T92;NEG_M243T211	C00380+C00106+C00813+C05281+C00438+C00475+C00055+C00099+C00299
Metabolism	Global and overview maps	Metabolic pathways	98	614	0.0736735	0.287678	ko01100	POS_M85T96;POS_M89T75;POS_M104T90;POS_M104T101;POS_M112T98;POS_M112T75;POS_M113T198;POS_M118T703_1;POS_M118T485;POS_M118T141;POS_M121T309;POS_M122T289;POS_M123T208;POS_M123T149;POS_M130T74;POS_M130T86;POS_M132T212;POS_M132T234;POS_M137T157;POS_M142T34;POS_M146T74;POS_M146T399;POS_M147T76;POS_M148T73;POS_M148T88;POS_M150T145;POS_M152T98_1;POS_M153T530;POS_M153T228;POS_M156T74_2;POS_M161T449;POS_M1…	C00164+C00134+C00334+C00114+C00380+C00388+C00106+C03283+C00463+C00183+C06758+C06757+C00180+C00153+C00433+C00408+C00407+C00123+C00262+C00346+C00026+C00966+C00047+C02614+C00025+C00073+C00242+C00755+C00379+C03680+C04287+C00956+C00031+C00811+C00079+C03722+C05587+C03972+C00438+C16737+C04002+C03871+C02325+C05604+C01061+C05610+C00978+C04556+C00931+C15650+C00475+C05841+C00352+C00212+C00387+C04717+C14827+…
Metabolism	Amino acid metabolism	Valine, leucine and isoleucine biosynthesis	5	17	0.0854889	0.304786	ko00290	POS_M118T141;POS_M132T212;POS_M132T234;NEG_M101T92;NEG_M175T99	C00183+C00407+C00123+C00109+C02504
Metabolism	Metabolism of cofactors and vitamins	Pantothenate and CoA biosynthesis	5	17	0.0854889	0.304786	ko00770	POS_M113T198;POS_M118T141;POS_M146T399;NEG_M89T92;NEG_M132T82	C00106+C00183+C00966+C00099+C00049
Human Diseases	Endocrine and metabolic diseases	Insulin resistance	3	8	0.0955809	0.307778	ko04931	POS_M163T96;POS_M259T204;NEG_M259T100	C00031+C00352+C00092
Metabolism	Metabolism of cofactors and vitamins	Nicotinate and nicotinamide metabolism	6	23	0.101538	0.307778	ko00760	POS_M104T90;POS_M123T149;POS_M168T347;POS_M256T98;NEG_M132T82;NEG_M138T607	C00334+C00153+C03722+C05841+C00049+C01020
Environmental Information Processing	Signal transduction	Phosphatidylinositol signaling system	2	4	0.102208	0.307778	ko04070	NEG_M180T92;NEG_M409T827	C00137+C00416
Metabolism	Amino acid metabolism	Valine, leucine and isoleucine degradation	4	13	0.104987	0.307778	ko00280	POS_M85T96;POS_M118T141;POS_M132T212;POS_M132T234	C00164+C00183+C00407+C00123
Metabolism	Carbohydrate metabolism	Galactose metabolism	5	18	0.105095	0.307778	ko00052	POS_M163T96;NEG_M180T92;NEG_M323T380;NEG_M342T99;NEG_M342T112	C00031+C00137+C00243+C05402+C00089
Human Diseases	Endocrine and metabolic diseases	AGE-RAGE signaling pathway in diabetic complications	1	1	0.144548	0.403366	ko04933	POS_M163T96	C00031
Metabolism	Global and overview maps	Biosynthesis of antibiotics	32	186	0.147573	0.403366	ko01130	POS_M89T75;POS_M118T141;POS_M132T212;POS_M146T74;POS_M147T76;POS_M148T88;POS_M162T97;POS_M163T96;POS_M166T344;POS_M172T309;POS_M183T538;POS_M189T150;POS_M210T213;POS_M259T204;POS_M331T666;POS_M348T270;POS_M353T404;POS_M387T677;POS_M395T485;POS_M425T785;POS_M552T659;NEG_M101T92;NEG_M132T82;NEG_M133T78_2;NEG_M159T105;NEG_M180T92;NEG_M180T175;NEG_M192T75;NEG_M196T83;NEG_M203T374;NEG_M259T100;NEG_M28…	C00134+C00183+C00407+C00026+C00047+C00025+C00956+C00031+C00079+C03972+C21087+C04002+C17949+C00352+C16754+C00020+C06686+C20504+C12369+C15808+C12476+C00109+C00049+C00149+C00322+C00137+C00082+C00158+C00257+C00078+C00092+C03406
Metabolism	Metabolism of other amino acids	Glutathione metabolism	4	16	0.19017	0.50303	ko00480	POS_M89T75;POS_M148T88;POS_M613T204_2;NEG_M173T94	C00134+C00025+C00127+C05422
Metabolism	Carbohydrate metabolism	Ascorbate and aldarate metabolism	5	22	0.201978	0.508504	ko00053	POS_M130T74;POS_M146T74;NEG_M129T100;NEG_M173T94;NEG_M180T92	C00433+C00026+C00684+C05422+C00137
Metabolism	Amino acid metabolism	Tyrosine metabolism	11	58	0.204642	0.508504	ko00350	POS_M85T96;POS_M121T229;POS_M152T289;POS_M165T208;POS_M168T322;POS_M183T207;POS_M195T354;POS_M201T402;NEG_M180T175;NEG_M359T541;NEG_M433T488_1	C00164+C06044+C02442+C00811+C05587+C03672+C05604+C01061+C00082+C01850+C01060
Metabolism	Amino acid metabolism	Arginine biosynthesis	4	17	0.222379	0.524573	ko00220	POS_M146T74;POS_M148T88;NEG_M132T82;NEG_M289T540	C00026+C00025+C00049+C03406
Metabolism	Amino acid metabolism	Phenylalanine, tyrosine and tryptophan biosynthesis	5	23	0.229878	0.524573	ko00400	POS_M118T485;POS_M166T344;NEG_M137T129;NEG_M180T175;NEG_M203T374	C00463+C00079+C00587+C00082+C00078
Metabolism	Amino acid metabolism	Phenylalanine metabolism	8	41	0.230762	0.524573	ko00360	POS_M105T382;POS_M122T382;POS_M123T208;POS_M153T530;POS_M165T208;POS_M166T344;NEG_M180T175;NEG_M206T208	C05853+C05332+C00180+C00755+C00811+C00079+C00082+C03519
Metabolism	Lipid metabolism	Glycerophospholipid metabolism	3	12	0.244985	0.524573	ko00564	POS_M104T101;POS_M142T34;NEG_M409T827	C00114+C00346+C00416
Metabolism	Carbohydrate metabolism	Propanoate metabolism	3	12	0.244985	0.524573	ko00640	POS_M85T96;NEG_M89T92;NEG_M101T92	C00164+C00099+C00109
Metabolism	Metabolism of cofactors and vitamins	Ubiquinone and other terpenoid-quinone biosynthesis	4	18	0.255889	0.524573	ko00130	POS_M165T208;POS_M183T207;POS_M424T768;NEG_M180T175	C00811+C03672+C14153+C00082
Metabolism	Carbohydrate metabolism	Butanoate metabolism	4	18	0.255889	0.524573	ko00650	POS_M85T96;POS_M104T90;POS_M146T74;POS_M148T88	C00164+C00334+C00026+C00025
Metabolism	Lipid metabolism	Synthesis and degradation of ketone bodies	1	2	0.268306	0.536612	ko00072	POS_M85T96	C00164
Metabolism	Carbohydrate metabolism	Pentose and glucuronate interconversions	4	20	0.325374	0.614056	ko00040	POS_M130T74;POS_M146T74;POS_M153T228;NEG_M149T91	C00433+C00026+C00379+C00181
Metabolism	Metabolism of other amino acids	Taurine and hypotaurine metabolism	2	8	0.325545	0.614056	ko00430	POS_M146T74;POS_M148T88	C00026+C00025
Metabolism	Metabolism of cofactors and vitamins	Porphyrin and chlorophyll metabolism	3	14	0.329493	0.614056	ko00860	POS_M148T88;POS_M226T694;POS_M655T714	C00025+C00931+C05769
Metabolism	Carbohydrate metabolism	Amino sugar and nucleotide sugar metabolism	5	27	0.349634	0.637111	ko00520	POS_M163T96;POS_M259T204;POS_M425T677;NEG_M149T91;NEG_M273T343	C00031+C00352+C01674+C00181+C04037
Metabolism	Global and overview maps	Biosynthesis of secondary metabolites	54	357	0.363563	0.638929	ko01110	POS_M89T75;POS_M112T75;POS_M118T485;POS_M118T141;POS_M123T208;POS_M130T86;POS_M132T212;POS_M132T234;POS_M146T74;POS_M146T399;POS_M147T76;POS_M148T88;POS_M150T145;POS_M153T530;POS_M162T97;POS_M163T96;POS_M165T208;POS_M166T344;POS_M172T309;POS_M183T207;POS_M190T309;POS_M193T449;POS_M209T660;POS_M226T694;POS_M227T99;POS_M256T164;POS_M301T508;POS_M336T612;POS_M348T270;POS_M357T563;POS_M377T450;POS_M3…	C00134+C00388+C00463+C00183+C00180+C00408+C00407+C00123+C00026+C00966+C00047+C00025+C00073+C00755+C00956+C00031+C00811+C00079+C03972+C03672+C03871+C02325+C05610+C00931+C05901+C16702+C10107+C00757+C00020+C21191+C00255+C15783+C14153+C05623+C05625+C05769+C07201+C00099+C00109+C00049+C00149+C00135+C02504+C12205+C00082+C01752+C00158+C01494+C00257+C00078+C03406+C01083+C00416+C07204
Metabolism	Biosynthesis of other secondary metabolites	Benzoxazinoid biosynthesis	1	3	0.37425	0.638929	ko00402	POS_M118T485	C00463
Metabolism	Energy metabolism	Nitrogen metabolism	1	3	0.37425	0.638929	ko00910	POS_M148T88	C00025
Metabolism	Lipid metabolism	Steroid biosynthesis	2	9	0.381799	0.638929	ko00100	POS_M393T816;POS_M425T785	C15783+C15808
Metabolism	Biosynthesis of other secondary metabolites	Tropane, piperidine and pyridine alkaloid biosynthesis	6	35	0.394656	0.647236	ko00960	POS_M86T233;POS_M89T75;POS_M130T86;POS_M132T212;POS_M147T76;POS_M166T344	C01746+C00134+C00408+C00407+C00047+C00079
Metabolism	Lipid metabolism	Arachidonic acid metabolism	6	37	0.450082	0.717427	ko00590	POS_M335T818;POS_M335T795;POS_M335T826;POS_M351T718;POS_M352T677;POS_M371T678	C05954+C05955+C06315+C05956+C05960+C05961
Metabolism	Carbohydrate metabolism	Citrate cycle (TCA cycle)	3	17	0.454953	0.717427	ko00020	POS_M146T74;NEG_M133T78_2;NEG_M192T75	C00026+C00149+C00158
Metabolism	Energy metabolism	Carbon fixation in photosynthetic organisms	2	11	0.487497	0.737651	ko00710	NEG_M132T82;NEG_M133T78_2	C00049+C00149
Metabolism	Metabolism of cofactors and vitamins	Thiamine metabolism	2	11	0.487497	0.737651	ko00730	POS_M219T204;NEG_M180T175	C04556+C00082
Metabolism	Biosynthesis of other secondary metabolites	Monobactam biosynthesis	3	18	0.494766	0.737651	ko00261	POS_M172T309;NEG_M132T82;NEG_M180T175	C03972+C00049+C00082
Metabolism	Biosynthesis of other secondary metabolites	Anthocyanin biosynthesis	2	12	0.535999	0.780491	ko00942	NEG_M449T402_2;NEG_M478T531	C08604+C12139
Metabolism	Lipid metabolism	Glycerolipid metabolism	1	5	0.542536	0.780491	ko00561	NEG_M409T827	C00416
Metabolism	Carbohydrate metabolism	Glyoxylate and dicarboxylate metabolism	4	27	0.563393	0.796521	ko00630	POS_M146T74;POS_M148T88;NEG_M133T78_2;NEG_M192T75	C00026+C00025+C00149+C00158
Metabolism	Carbohydrate metabolism	Glycolysis / Gluconeogenesis	2	13	0.581274	0.807873	ko00010	POS_M163T96;NEG_M267T369	C00031+C01451
Metabolism	Lipid metabolism	Linoleic acid metabolism	3	21	0.6046	0.818578	ko00591	POS_M295T817;POS_M313T784;POS_M315T814	C04717+C14827+C14829
Metabolism	Biosynthesis of other secondary metabolites	Carbapenem biosynthesis	1	6	0.608942	0.818578	ko00332	POS_M148T88	C00025
Metabolism	Metabolism of terpenoids and polyketides	Zeatin biosynthesis	2	15	0.661896	0.851468	ko00908	POS_M348T270;NEG_M134T293	C00020+C00147
Metabolism	Biosynthesis of other secondary metabolites	Isoquinoline alkaloid biosynthesis	5	38	0.66336	0.851468	ko00950	POS_M165T208;POS_M256T164;POS_M336T612;POS_M362T286;NEG_M180T175	C00811+C16702+C00757+C06327+C00082
Metabolism	Lipid metabolism	Sphingolipid metabolism	1	7	0.665757	0.851468	ko00600	POS_M142T34	C00346
Metabolism	Global and overview maps	Carbon metabolism	6	46	0.674944	0.851468	ko01200	POS_M146T74;POS_M148T88;NEG_M132T82;NEG_M133T78_2;NEG_M192T75;NEG_M196T83	C00026+C00025+C00049+C00149+C00158+C00257
Metabolism	Amino acid metabolism	Glycine, serine and threonine metabolism	5	39	0.686738	0.85322	ko00260	POS_M104T101;POS_M118T703_1;NEG_M101T92;NEG_M132T82;NEG_M203T374	C00114+C03283+C00109+C00049+C00078
Metabolism	Carbohydrate metabolism	Pyruvate metabolism	2	16	0.697323	0.85344	ko00620	NEG_M133T78_2;NEG_M175T99	C00149+C02504
Metabolism	Metabolism of cofactors and vitamins	Biotin metabolism	1	8	0.714359	0.861432	ko00780	POS_M147T76	C00047
Metabolism	Lipid metabolism	Fatty acid biosynthesis	1	9	0.755929	0.875982	ko00061	NEG_M265T777	C01530
Metabolism	Carbohydrate metabolism	Pentose phosphate pathway	2	18	0.758997	0.875982	ko00030	POS_M163T96;NEG_M196T83	C00031+C00257
Metabolism	Amino acid metabolism	Tryptophan metabolism	5	43	0.769108	0.875982	ko00380	POS_M118T485;POS_M168T347;POS_M218T485;NEG_M159T105;NEG_M203T374	C00463+C03722+C00978+C00322+C00078
Metabolism	Biosynthesis of other secondary metabolites	Flavonoid biosynthesis	4	35	0.769155	0.875982	ko00941	POS_M301T508;POS_M435T491;POS_M435T581;POS_M581T485	C10107+C16492+C09099+C09789
Metabolism	Metabolism of cofactors and vitamins	Riboflavin metabolism	1	10	0.791479	0.883338	ko00740	POS_M377T450	C00255
Metabolism	Lipid metabolism	Biosynthesis of unsaturated fatty acids	2	20	0.809554	0.883338	ko01040	NEG_M265T777;NEG_M311T799	C01530+C06425
Metabolism	Amino acid metabolism	Cysteine and methionine metabolism	4	38	0.823649	0.883338	ko00270	POS_M150T145;POS_M242T74;NEG_M101T92;NEG_M132T82	C00073+C15650+C00109+C00049
Metabolism	Metabolism of cofactors and vitamins	Folate biosynthesis	1	12	0.847866	0.883338	ko00790	POS_M254T204	C05926
Metabolism	Biosynthesis of other secondary metabolites	Stilbenoid, diarylheptanoid and gingerol biosynthesis	1	12	0.847866	0.883338	ko00945	POS_M227T99	C05901
Metabolism	Biosynthesis of other secondary metabolites	Isoflavonoid biosynthesis	2	22	0.850486	0.883338	ko00943	POS_M417T660;POS_M433T500_1	C10216+C09126
Metabolism	Global and overview maps	Microbial metabolism in diverse environments	30	239	0.851021	0.883338	ko01120	POS_M85T96;POS_M97T96;POS_M104T90;POS_M110T74;POS_M118T703_1;POS_M121T309;POS_M122T289;POS_M123T208;POS_M146T74;POS_M147T76;POS_M148T88;POS_M153T530;POS_M161T449;POS_M172T309;POS_M174T74_1;POS_M179T456;POS_M189T150;POS_M201T402;POS_M226T694;POS_M261T104;POS_M318T541;POS_M515T542_2;NEG_M132T82;NEG_M133T78_2;NEG_M137T129;NEG_M138T607;NEG_M159T105;NEG_M180T92;NEG_M192T75;NEG_M196T83	C00164+C14279+C00334+C14450+C03283+C06758+C06757+C00180+C00026+C00047+C00025+C00755+C04287+C03972+C06333+C16737+C04002+C01061+C00931+C18096+C01031+C19153+C00049+C00149+C00587+C01020+C00322+C00137+C00158+C00257
Metabolism	Global and overview maps	Degradation of aromatic compounds	5	51	0.883397	0.905482	ko01220	POS_M121T309;POS_M122T289;POS_M123T208;POS_M165T208;NEG_M137T129	C06758+C06757+C00180+C00811+C00587
Metabolism	Carbohydrate metabolism	Fructose and mannose metabolism	1	15	0.905297	0.916473	ko00051	POS_M261T104	C18096
Metabolism	Amino acid metabolism	Arginine and proline metabolism	4	48	0.934511	0.934511	ko00330	POS_M89T75;POS_M104T90;POS_M130T74;POS_M148T88	C00134+C00334+C00433+C00025

## Sheet: Root-vs-Leaf
KEGG_A_class	KEGG_B_class	Pathway	Root-vs-Leaf (190)	All (1183)	Pvalue	Qvalue	Pathway ID	Metabolites	C_IDs
Genetic Information Processing	Translation	Aminoacyl-tRNA biosynthesis	13	24	1.57011e-05	0.00130319	ko00970	POS_M118T141;POS_M132T212;POS_M132T234;POS_M147T76;POS_M148T88;POS_M150T145;POS_M166T344;NEG_M131T87;NEG_M132T82;NEG_M154T94;NEG_M173T90;NEG_M180T175;NEG_M203T374	C00183+C00407+C00123+C00047+C00025+C00073+C00079+C00152+C00049+C00135+C00062+C00082+C00078
Metabolism	Biosynthesis of other secondary metabolites	Flavone and flavonol biosynthesis	12	25	0.000159778	0.00541686	ko00944	POS_M301T508;POS_M315T669;POS_M465T506;POS_M565T478_2;POS_M595T515_2;POS_M611T491_2;NEG_M285T693;NEG_M299T723;NEG_M315T659;NEG_M317T423;NEG_M431T492_1;NEG_M610T485_3	C10107+C12633+C05623+C04858+C21833+C05625+C05903+C10098+C04443+C10107+C01714+C05625
Metabolism	Global and overview maps	2-Oxocarboxylic acid metabolism	18	48	0.00019579	0.00541686	ko01210	POS_M118T141;POS_M132T212;POS_M132T234;POS_M146T74;POS_M147T76;POS_M148T88;POS_M150T145;POS_M162T97;POS_M166T344;POS_M189T150;POS_M190T189;NEG_M101T92;NEG_M132T82;NEG_M159T105;NEG_M175T99;NEG_M180T175;NEG_M192T75;NEG_M203T374	C00183+C00407+C00123+C00026+C00047+C00025+C00073+C00956+C00079+C04002+C00624+C00109+C00049+C00322+C02504+C00082+C00158+C00078
Environmental Information Processing	Membrane transport	ABC transporters	19	62	0.00236971	0.0448449	ko02010	POS_M118T141;POS_M132T212;POS_M132T234;POS_M147T76;POS_M148T88;POS_M163T96;POS_M166T344;POS_M245T531;POS_M325T96;POS_M425T677;NEG_M132T82;NEG_M149T91;NEG_M154T94;NEG_M173T90;NEG_M180T92;NEG_M323T380;NEG_M341T112;NEG_M342T99;NEG_M342T112	C00183+C00407+C00123+C00047+C00025+C00031+C00079+C00120+C00185+C01674+C00049+C00181+C00135+C00062+C00137+C00243+C01083+C05402+C00089
Metabolism	Biosynthesis of other secondary metabolites	Glucosinolate biosynthesis	7	14	0.0031106	0.0448449	ko00966	POS_M118T141;POS_M132T212;POS_M132T234;POS_M150T145;POS_M166T344;NEG_M180T175;NEG_M203T374	C00183+C00407+C00123+C00073+C00079+C00082+C00078
Metabolism	Amino acid metabolism	Alanine, aspartate and glutamate metabolism	10	25	0.0032418	0.0448449	ko00250	POS_M104T90;POS_M146T74;POS_M148T88;POS_M176T146;POS_M259T204;NEG_M131T87;NEG_M132T82;NEG_M192T75;NEG_M289T540;NEG_M303T487	C00334+C00026+C00025+C00438+C00352+C00152+C00049+C00158+C03406+C12270
Metabolism	Biosynthesis of other secondary metabolites	Phenylpropanoid biosynthesis	13	40	0.00680087	0.076493	ko00940	POS_M121T289;POS_M134T97_1;POS_M147T416;POS_M165T208;POS_M166T344;POS_M209T660;POS_M342T542;NEG_M129T89;NEG_M177T590;NEG_M180T175;NEG_M191T537;NEG_M193T349;NEG_M312T599	C05627+C20464+C05851+C00811+C00079+C05610+C00761+C00423+C12205+C00082+C01752+C01494+C05855
Metabolism	Carbohydrate metabolism	Starch and sucrose metabolism	5	9	0.00737281	0.076493	ko00500	POS_M163T96;POS_M325T96;NEG_M259T100;NEG_M341T112;NEG_M342T112	C00031+C00185+C00092+C01083+C00089
Metabolism	Amino acid metabolism	Histidine metabolism	9	26	0.0152806	0.140921	ko00340	POS_M112T75;POS_M146T74;POS_M148T88;POS_M152T322;POS_M155T86;POS_M156T74_2;NEG_M132T82;NEG_M154T94;NEG_M207T208	C00388+C00026+C00025+C01152+C03277+C03680+C00049+C00135+C00386
Metabolism	Global and overview maps	Biosynthesis of amino acids	22	90	0.0213982	0.168239	ko01230	POS_M118T141;POS_M132T212;POS_M132T234;POS_M146T74;POS_M147T76;POS_M148T88;POS_M150T145;POS_M162T97;POS_M166T344;POS_M189T150;POS_M190T189;NEG_M101T92;NEG_M131T87;NEG_M132T82;NEG_M154T94;NEG_M159T105;NEG_M173T90;NEG_M175T99;NEG_M180T175;NEG_M192T75;NEG_M203T374;NEG_M289T540	C00183+C00407+C00123+C00026+C00047+C00025+C00073+C00956+C00079+C04002+C00624+C00109+C00152+C00049+C00135+C00322+C00062+C02504+C00082+C00158+C00078+C03406
Metabolism	Metabolism of other amino acids	Cyanoamino acid metabolism	7	19	0.0222967	0.168239	ko00460	POS_M118T141;POS_M132T212;POS_M166T344;NEG_M89T79_1;NEG_M131T87;NEG_M132T82;NEG_M180T175	C00183+C00407+C00079+C01401+C00152+C00049+C00082
Metabolism	Nucleotide metabolism	Purine metabolism	12	42	0.026742	0.184966	ko00230	POS_M133T123;POS_M137T157;POS_M152T98_1;POS_M252T294;POS_M268T275;POS_M284T298;POS_M330T190;POS_M346T234;POS_M348T270;POS_M364T179;NEG_M134T293;NEG_M346T310	C00802+C00262+C00242+C00559+C00212+C00387+C00575+C06194+C00020+C06193+C00147+C01367
Metabolism	Metabolism of other amino acids	beta-Alanine metabolism	7	21	0.0387364	0.231314	ko00410	POS_M104T90;POS_M113T198;NEG_M89T92;NEG_M132T82;NEG_M154T94;NEG_M207T208;NEG_M218T192	C00334+C00106+C00099+C00049+C00135+C00386+C00864
Metabolism	Amino acid metabolism	Arginine biosynthesis	6	17	0.0418037	0.231314	ko00220	POS_M146T74;POS_M148T88;POS_M190T189;NEG_M132T82;NEG_M173T90;NEG_M289T540	C00026+C00025+C00624+C00049+C00062+C03406
Metabolism	Metabolism of cofactors and vitamins	Pantothenate and CoA biosynthesis	6	17	0.0418037	0.231314	ko00770	POS_M113T198;POS_M118T141;POS_M146T399;NEG_M89T92;NEG_M132T82;NEG_M218T192	C00106+C00183+C00966+C00099+C00049+C00864
Metabolism	Amino acid metabolism	Phenylalanine, tyrosine and tryptophan biosynthesis	7	23	0.0615967	0.319533	ko00400	POS_M118T485;POS_M166T344;NEG_M137T129;NEG_M153T442;NEG_M180T175;NEG_M191T84;NEG_M203T374	C00463+C00079+C00587+C00230+C00082+C00296+C00078
Metabolism	Global and overview maps	Biosynthesis of antibiotics	37	186	0.0769784	0.343265	ko01130	POS_M118T141;POS_M132T212;POS_M146T74;POS_M147T76;POS_M148T88;POS_M162T97;POS_M163T96;POS_M166T344;POS_M183T538;POS_M189T150;POS_M190T189;POS_M210T213;POS_M259T204;POS_M329T623;POS_M331T666;POS_M348T270;POS_M353T404;POS_M366T559;POS_M387T677;POS_M395T485;POS_M425T785;POS_M510T593_2;POS_M552T659;POS_M562T528;NEG_M101T92;NEG_M105T84;NEG_M132T82;NEG_M133T78_2;NEG_M153T442;NEG_M159T105;NEG_M173T90;NE…	C00183+C00407+C00026+C00047+C00025+C00956+C00031+C00079+C21087+C04002+C00624+C17949+C00352+C16755+C16754+C00020+C06686+C17582+C20504+C12369+C15808+C01925+C12476+C07030+C00109+C00258+C00049+C00149+C00230+C00322+C00062+C00137+C00082+C00158+C00078+C00092+C03406
Metabolism	Biosynthesis of other secondary metabolites	Indole alkaloid biosynthesis	4	11	0.0845877	0.343265	ko00901	POS_M163T96;POS_M810T814_1;NEG_M203T374;NEG_M805T592	C00031+C07201+C00078+C07204
Metabolism	Carbohydrate metabolism	Inositol phosphate metabolism	3	7	0.0868503	0.343265	ko00562	POS_M179T456;NEG_M180T92;NEG_M259T100	C16737+C00137+C00092
Metabolism	Lipid metabolism	Sphingolipid metabolism	3	7	0.0868503	0.343265	ko00600	POS_M142T34;POS_M300T783;POS_M318T776	C00346+C02934+C12144
Metabolism	Biosynthesis of other secondary metabolites	Betalain biosynthesis	3	7	0.0868503	0.343265	ko00965	POS_M168T322;POS_M195T354;NEG_M180T175	C05587+C05604+C00082
Metabolism	Metabolism of other amino acids	Glutathione metabolism	5	16	0.0986686	0.35632	ko00480	POS_M148T88;POS_M219T142_1;POS_M613T204_2;NEG_M173T94;NEG_M611T485_1	C00025+C03740+C00127+C05422+C00127
Metabolism	Global and overview maps	Metabolic pathways	107	614	0.105567	0.35632	ko01100	POS_M85T96;POS_M104T90;POS_M112T98;POS_M112T75;POS_M113T198;POS_M118T485;POS_M118T141;POS_M121T309;POS_M122T289;POS_M123T208;POS_M123T149;POS_M130T74;POS_M130T86;POS_M132T212;POS_M132T234;POS_M137T157;POS_M142T34;POS_M146T74;POS_M146T399;POS_M147T76;POS_M148T73;POS_M148T88;POS_M150T145;POS_M152T98_1;POS_M153T530;POS_M156T74_2;POS_M162T97;POS_M163T96;POS_M165T208;POS_M166T344;POS_M168T322;POS_M176…	C00164+C00334+C00380+C00388+C00106+C00463+C00183+C06758+C06757+C00180+C00153+C00433+C00408+C00407+C00123+C00262+C00346+C00026+C00966+C00047+C02614+C00025+C00073+C00242+C00755+C03680+C00956+C00031+C00811+C00079+C05587+C00438+C16737+C04002+C00624+C05604+C01061+C05610+C01112+C00978+C04556+C03740+C00931+C00268+C15650+C00475+C00120+C00559+C04874+C00352+C00212+C00387+C04717+C02934+C14827+C05202+C12144+…
Metabolism	Amino acid metabolism	Lysine degradation	7	26	0.108663	0.35632	ko00310	POS_M85T96;POS_M130T86;POS_M147T76;POS_M159T399;POS_M162T97;POS_M219T357;NEG_M159T105	C00164+C00408+C00047+C03087+C00956+C04020+C00322
Metabolism	Biosynthesis of other secondary metabolites	Anthocyanin biosynthesis	4	12	0.111534	0.35632	ko00942	POS_M566T478_2;POS_M612T491_2;NEG_M449T402_2;NEG_M478T531	C20489+C16315+C08604+C12139
Metabolism	Amino acid metabolism	Valine, leucine and isoleucine biosynthesis	5	17	0.122362	0.35632	ko00290	POS_M118T141;POS_M132T212;POS_M132T234;NEG_M101T92;NEG_M175T99	C00183+C00407+C00123+C00109+C02504
Human Diseases	Endocrine and metabolic diseases	Insulin resistance	3	8	0.123023	0.35632	ko04931	POS_M163T96;POS_M259T204;NEG_M259T100	C00031+C00352+C00092
Environmental Information Processing	Signal transduction	Phosphatidylinositol signaling system	2	4	0.123325	0.35632	ko04070	NEG_M180T92;NEG_M409T827	C00137+C00416
Metabolism	Nucleotide metabolism	Pyrimidine metabolism	9	37	0.124497	0.35632	ko00240	POS_M112T98;POS_M113T198;POS_M128T74;POS_M142T74_1;POS_M176T146;POS_M244T98;POS_M324T142;NEG_M89T92;NEG_M243T211	C00380+C00106+C00813+C05281+C00438+C00475+C00055+C00099+C00299
Metabolism	Amino acid metabolism	Valine, leucine and isoleucine degradation	4	13	0.141757	0.373325	ko00280	POS_M85T96;POS_M118T141;POS_M132T212;POS_M132T234	C00164+C00183+C00407+C00123
Metabolism	Carbohydrate metabolism	Galactose metabolism	5	18	0.14843	0.373325	ko00052	POS_M163T96;NEG_M180T92;NEG_M323T380;NEG_M342T99;NEG_M342T112	C00031+C00137+C00243+C05402+C00089
Metabolism	Metabolism of cofactors and vitamins	Ubiquinone and other terpenoid-quinone biosynthesis	5	18	0.14843	0.373325	ko00130	POS_M165T208;POS_M183T207;POS_M424T768;NEG_M129T89;NEG_M180T175	C00811+C03672+C14153+C00423+C00082
Metabolism	Carbohydrate metabolism	Butanoate metabolism	5	18	0.14843	0.373325	ko00650	POS_M85T96;POS_M104T90;POS_M146T74;POS_M148T88;NEG_M85T79	C00164+C00334+C00026+C00025+C00741
Human Diseases	Endocrine and metabolic diseases	AGE-RAGE signaling pathway in diabetic complications	1	1	0.160609	0.392074	ko04933	POS_M163T96	C00031
Metabolism	Lipid metabolism	Glycerolipid metabolism	2	5	0.184358	0.429165	ko00561	NEG_M105T84;NEG_M409T827	C00258+C00416
Metabolism	Global and overview maps	Biosynthesis of secondary metabolites	63	357	0.186144	0.429165	ko01110	POS_M112T75;POS_M118T485;POS_M118T141;POS_M123T208;POS_M130T86;POS_M132T212;POS_M132T234;POS_M146T74;POS_M146T399;POS_M147T416;POS_M147T76;POS_M148T88;POS_M150T145;POS_M153T530;POS_M162T97;POS_M163T96;POS_M165T208;POS_M166T344;POS_M183T207;POS_M190T189;POS_M209T660;POS_M226T694;POS_M227T99;POS_M256T164;POS_M301T508;POS_M315T599;POS_M336T612;POS_M336T517;POS_M341T600;POS_M348T270;POS_M357T563;POS_…	C00388+C00463+C00183+C00180+C00408+C00407+C00123+C00026+C00966+C05851+C00047+C00025+C00073+C00755+C00956+C00031+C00811+C00079+C03672+C00624+C05610+C00931+C05901+C16702+C10107+C05202+C00757+C06176+C04118+C00020+C21191+C15783+C14153+C05623+C21833+C05625+C05769+C07201+C00099+C00109+C00258+C00423+C00152+C00049+C00149+C00230+C00135+C00062+C02504+C12205+C00082+C01752+C00158+C01494+C00078+C00864+C05903+…
Metabolism	Amino acid metabolism	Phenylalanine metabolism	9	41	0.19922	0.436088	ko00360	POS_M105T382;POS_M122T382;POS_M123T208;POS_M153T530;POS_M165T208;POS_M166T344;NEG_M129T89;NEG_M180T175;NEG_M206T208	C05853+C05332+C00180+C00755+C00811+C00079+C00423+C00082+C03519
Metabolism	Amino acid metabolism	Lysine biosynthesis	6	25	0.200714	0.436088	ko00300	POS_M146T74;POS_M147T76;POS_M162T97;POS_M189T150;NEG_M132T82;NEG_M159T105	C00026+C00047+C00956+C04002+C00049+C00322
Metabolism	Amino acid metabolism	Tyrosine metabolism	12	58	0.207501	0.436088	ko00350	POS_M85T96;POS_M121T229;POS_M152T289;POS_M165T208;POS_M168T322;POS_M183T207;POS_M195T354;POS_M201T402;NEG_M167T528;NEG_M180T175;NEG_M359T541;NEG_M433T488_1	C00164+C06044+C02442+C00811+C05587+C03672+C05604+C01061+C01161+C00082+C01850+C01060
Metabolism	Carbohydrate metabolism	C5-Branched dibasic acid metabolism	4	15	0.210163	0.436088	ko00660	POS_M146T74;POS_M148T73;POS_M148T88;NEG_M101T92	C00026+C02614+C00025+C00109
Metabolism	Carbohydrate metabolism	Amino sugar and nucleotide sugar metabolism	6	27	0.257083	0.520436	ko00520	POS_M163T96;POS_M259T204;POS_M425T677;NEG_M149T91;NEG_M273T343;NEG_M614T478_2	C00031+C00352+C01674+C00181+C04037+C00128
Metabolism	Carbohydrate metabolism	Ascorbate and aldarate metabolism	5	22	0.271026	0.535599	ko00053	POS_M130T74;POS_M146T74;NEG_M129T100;NEG_M173T94;NEG_M180T92	C00433+C00026+C00684+C05422+C00137
Metabolism	Lipid metabolism	Synthesis and degradation of ketone bodies	1	2	0.295536	0.554784	ko00072	POS_M85T96	C00164
Metabolism	Carbohydrate metabolism	Propanoate metabolism	3	12	0.300787	0.554784	ko00640	POS_M85T96;NEG_M89T92;NEG_M101T92	C00164+C00099+C00109
Metabolism	Metabolism of cofactors and vitamins	Folate biosynthesis	3	12	0.300787	0.554784	ko00790	POS_M239T321;POS_M254T204;POS_M256T152	C00268+C05926+C04874
Metabolism	Metabolism of other amino acids	Taurine and hypotaurine metabolism	2	8	0.376489	0.664863	ko00430	POS_M146T74;POS_M148T88	C00026+C00025
Metabolism	Metabolism of cofactors and vitamins	Biotin metabolism	2	8	0.376489	0.664863	ko00780	POS_M147T76;POS_M245T531	C00047+C00120
Metabolism	Metabolism of cofactors and vitamins	Porphyrin and chlorophyll metabolism	3	14	0.395867	0.669194	ko00860	POS_M148T88;POS_M226T694;POS_M655T714	C00025+C00931+C05769
Metabolism	Biosynthesis of other secondary metabolites	Benzoxazinoid biosynthesis	1	3	0.408871	0.669194	ko00402	POS_M118T485	C00463
Metabolism	Energy metabolism	Nitrogen metabolism	1	3	0.408871	0.669194	ko00910	POS_M148T88	C00025
Metabolism	Biosynthesis of other secondary metabolites	Isoquinoline alkaloid biosynthesis	7	38	0.411192	0.669194	ko00950	POS_M165T208;POS_M256T164;POS_M315T599;POS_M336T612;POS_M341T600;POS_M362T286;NEG_M180T175	C00811+C16702+C05202+C00757+C04118+C06327+C00082
Metabolism	Global and overview maps	Degradation of aromatic compounds	9	51	0.436272	0.68012	ko01220	POS_M121T309;POS_M122T289;POS_M123T208;POS_M165T208;NEG_M129T89;NEG_M137T129;NEG_M153T442;NEG_M167T528;NEG_M172T292	C06758+C06757+C00180+C00811+C00423+C00587+C00230+C01161+C06677
Metabolism	Lipid metabolism	Steroid biosynthesis	2	9	0.437321	0.68012	ko00100	POS_M393T816;POS_M425T785	C15783+C15808
Metabolism	Carbohydrate metabolism	Glyoxylate and dicarboxylate metabolism	5	27	0.442488	0.68012	ko00630	POS_M146T74;POS_M148T88;NEG_M105T84;NEG_M133T78_2;NEG_M192T75	C00026+C00025+C00258+C00149+C00158
Metabolism	Biosynthesis of other secondary metabolites	Flavonoid biosynthesis	6	35	0.50223	0.733971	ko00941	POS_M301T508;POS_M435T491;POS_M435T581;POS_M581T485;NEG_M285T693;NEG_M317T423	C10107+C16492+C09099+C09789+C05903+C10107
Metabolism	Biosynthesis of other secondary metabolites	Tropane, piperidine and pyridine alkaloid biosynthesis	6	35	0.50223	0.733971	ko00960	POS_M86T233;POS_M130T86;POS_M132T212;POS_M147T76;POS_M166T344;POS_M336T517	C01746+C00408+C00407+C00047+C00079+C06176
Metabolism	Metabolism of other amino acids	D-Arginine and D-ornithine metabolism	1	4	0.504053	0.733971	ko00472	NEG_M173T90	C00062
Metabolism	Metabolism of cofactors and vitamins	Nicotinate and nicotinamide metabolism	4	23	0.518519	0.742018	ko00760	POS_M104T90;POS_M123T149;NEG_M132T82;NEG_M138T607	C00334+C00153+C00049+C01020
Metabolism	Carbohydrate metabolism	Citrate cycle (TCA cycle)	3	17	0.530466	0.746217	ko00020	POS_M146T74;NEG_M133T78_2;NEG_M192T75	C00026+C00149+C00158
Metabolism	Energy metabolism	Carbon fixation in photosynthetic organisms	2	11	0.548425	0.746217	ko00710	NEG_M132T82;NEG_M133T78_2	C00049+C00149
Metabolism	Metabolism of cofactors and vitamins	Thiamine metabolism	2	11	0.548425	0.746217	ko00730	POS_M219T204;NEG_M180T175	C04556+C00082
Metabolism	Biosynthesis of other secondary metabolites	Monobactam biosynthesis	3	18	0.571554	0.765145	ko00261	NEG_M132T82;NEG_M173T90;NEG_M180T175	C00049+C00062+C00082
Metabolism	Lipid metabolism	Glycerophospholipid metabolism	2	12	0.597953	0.787779	ko00564	POS_M142T34;NEG_M409T827	C00346+C00416
Metabolism	Carbohydrate metabolism	Pentose and glucuronate interconversions	3	20	0.646763	0.831375	ko00040	POS_M130T74;POS_M146T74;NEG_M149T91	C00433+C00026+C00181
Metabolism	Biosynthesis of other secondary metabolites	Carbapenem biosynthesis	1	6	0.651077	0.831375	ko00332	POS_M148T88	C00025
Metabolism	Lipid metabolism	Linoleic acid metabolism	3	21	0.680707	0.85604	ko00591	POS_M295T817;POS_M313T784;NEG_M295T824	C04717+C14827+C14762
Metabolism	Metabolism of terpenoids and polyketides	Zeatin biosynthesis	2	15	0.721819	0.894193	ko00908	POS_M348T270;NEG_M134T293	C00020+C00147
Metabolism	Carbohydrate metabolism	Pyruvate metabolism	2	16	0.755323	0.921939	ko00620	NEG_M133T78_2;NEG_M175T99	C00149+C02504
Metabolism	Global and overview maps	Carbon metabolism	6	46	0.774944	0.932178	ko01200	POS_M146T74;POS_M148T88;NEG_M105T84;NEG_M132T82;NEG_M133T78_2;NEG_M192T75	C00026+C00025+C00258+C00049+C00149+C00158
Metabolism	Carbohydrate metabolism	Pentose phosphate pathway	2	18	0.812023	0.954072	ko00030	POS_M163T96;NEG_M105T84	C00031+C00258
Metabolism	Metabolism of cofactors and vitamins	Riboflavin metabolism	1	10	0.827628	0.954072	ko00740	POS_M441T401_2	C01847
Metabolism	Metabolism of terpenoids and polyketides	Carotenoid biosynthesis	1	10	0.827628	0.954072	ko00906	POS_M584T834_1	C08584
Metabolism	Amino acid metabolism	Tryptophan metabolism	5	43	0.846719	0.956208	ko00380	POS_M118T485;POS_M218T485;NEG_M159T105;NEG_M188T362;NEG_M203T374	C00463+C00978+C00322+C01717+C00078
Metabolism	Biosynthesis of other secondary metabolites	Stilbenoid, diarylheptanoid and gingerol biosynthesis	1	12	0.878967	0.956208	ko00945	POS_M227T99	C05901
Metabolism	Amino acid metabolism	Cysteine and methionine metabolism	4	38	0.883868	0.956208	ko00270	POS_M150T145;POS_M242T74;NEG_M101T92;NEG_M132T82	C00073+C15650+C00109+C00049
Metabolism	Biosynthesis of other secondary metabolites	Isoflavonoid biosynthesis	2	22	0.891586	0.956208	ko00943	POS_M417T660;POS_M433T500_1	C10216+C09126
Metabolism	Amino acid metabolism	Glycine, serine and threonine metabolism	4	39	0.896055	0.956208	ko00260	NEG_M101T92;NEG_M105T84;NEG_M132T82;NEG_M203T374	C00109+C00258+C00049+C00078
Metabolism	Carbohydrate metabolism	Glycolysis / Gluconeogenesis	1	13	0.898605	0.956208	ko00010	POS_M163T96	C00031
Metabolism	Carbohydrate metabolism	Fructose and mannose metabolism	1	15	0.928875	0.975906	ko00051	POS_M261T104	C18096
Metabolism	Global and overview maps	Microbial metabolism in diverse environments	30	239	0.962801	0.982612	ko01120	POS_M85T96;POS_M97T96;POS_M104T90;POS_M110T74;POS_M121T309;POS_M122T289;POS_M123T208;POS_M133T123;POS_M146T74;POS_M147T76;POS_M148T88;POS_M153T530;POS_M174T74_1;POS_M179T456;POS_M189T150;POS_M201T402;POS_M226T694;POS_M261T104;NEG_M105T84;NEG_M129T89;NEG_M132T82;NEG_M133T78_2;NEG_M137T129;NEG_M138T607;NEG_M153T442;NEG_M159T105;NEG_M167T528;NEG_M172T292;NEG_M180T92;NEG_M192T75	C00164+C14279+C00334+C14450+C06758+C06757+C00180+C00802+C00026+C00047+C00025+C00755+C06333+C16737+C04002+C01061+C00931+C18096+C00258+C00423+C00049+C00149+C00587+C01020+C00230+C00322+C01161+C06677+C00137+C00158
Metabolism	Amino acid metabolism	Arginine and proline metabolism	4	48	0.964109	0.982612	ko00330	POS_M104T90;POS_M130T74;POS_M148T88;NEG_M173T90	C00334+C00433+C00025+C00062
Metabolism	Lipid metabolism	Biosynthesis of unsaturated fatty acids	1	20	0.970773	0.982612	ko01040	POS_M330T795	C16513
Metabolism	Lipid metabolism	Arachidonic acid metabolism	2	37	0.988511	0.988511	ko00590	POS_M352T677;POS_M371T678	C05960+C05961

## Sheet: Root-vs-Seed
KEGG_A_class	KEGG_B_class	Pathway	Root-vs-Seed (176)	All (1183)	Pvalue	Qvalue	Pathway ID	Metabolites	C_IDs
Genetic Information Processing	Translation	Aminoacyl-tRNA biosynthesis	13	24	6.45572e-06	0.000535825	ko00970	POS_M132T212;POS_M132T234;POS_M147T76;POS_M148T88;POS_M150T145;POS_M166T344;NEG_M131T87;NEG_M132T82;NEG_M145T90;NEG_M154T94;NEG_M173T90;NEG_M180T175;NEG_M203T374	C00407+C00123+C00047+C00025+C00073+C00079+C00152+C00049+C00064+C00135+C00062+C00082+C00078
Metabolism	Metabolism of other amino acids	beta-Alanine metabolism	10	21	0.000331307	0.0137492	ko00410	POS_M104T90;POS_M113T198;POS_M146T431;POS_M168T347;POS_M217T329;NEG_M103T80;NEG_M132T82;NEG_M154T94;NEG_M207T208;NEG_M218T192	C00334+C00106+C00315+C03722+C05341+C00383+C00049+C00135+C00386+C00864
Environmental Information Processing	Membrane transport	ABC transporters	19	62	0.000900007	0.0249002	ko02010	POS_M89T75;POS_M104T101;POS_M132T212;POS_M132T234;POS_M146T431;POS_M147T76;POS_M148T88;POS_M166T344;POS_M302T449;POS_M308T146;POS_M325T96;NEG_M132T82;NEG_M145T90;NEG_M149T91;NEG_M154T94;NEG_M163T97;NEG_M173T90;NEG_M342T99;NEG_M503T99	C00134+C00114+C00407+C00123+C00315+C00047+C00025+C00079+C06687+C00051+C00185+C00049+C00064+C00181+C00135+C00392+C00062+C05402+C00492
Metabolism	Biosynthesis of other secondary metabolites	Phenylpropanoid biosynthesis	13	40	0.00341324	0.0708247	ko00940	POS_M121T289;POS_M146T431;POS_M165T208;POS_M166T344;POS_M209T660;POS_M342T542;NEG_M129T89;NEG_M147T82;NEG_M177T590;NEG_M180T175;NEG_M191T537;NEG_M193T349;NEG_M312T599	C05627+C00315+C00811+C00079+C05610+C00761+C00423+C05608+C12205+C00082+C01752+C01494+C05855
Metabolism	Amino acid metabolism	Alanine, aspartate and glutamate metabolism	9	25	0.0069344	0.0959259	ko00250	POS_M104T90;POS_M146T74;POS_M148T88;POS_M176T146;NEG_M131T87;NEG_M132T82;NEG_M145T90;NEG_M192T75;NEG_M303T487	C00334+C00026+C00025+C00438+C00152+C00049+C00064+C00158+C12270
Metabolism	Biosynthesis of other secondary metabolites	Flavone and flavonol biosynthesis	9	25	0.0069344	0.0959259	ko00944	POS_M465T506;POS_M565T478_2;POS_M595T476_1;POS_M611T491_2;NEG_M299T723;NEG_M315T659;NEG_M431T492_1;NEG_M563T481_1;NEG_M610T485_3	C05623+C04858+C04024+C05625+C10098+C04443+C01714+C04858+C05625
Metabolism	Biosynthesis of other secondary metabolites	Glucosinolate biosynthesis	6	14	0.0106112	0.125819	ko00966	POS_M132T212;POS_M132T234;POS_M150T145;POS_M166T344;NEG_M180T175;NEG_M203T374	C00407+C00123+C00073+C00079+C00082+C00078
Metabolism	Amino acid metabolism	Phenylalanine metabolism	12	41	0.0123061	0.127676	ko00360	POS_M105T382;POS_M121T415;POS_M122T382;POS_M123T208;POS_M153T530;POS_M165T208;POS_M166T344;NEG_M129T89;NEG_M137T379;NEG_M165T359_3;NEG_M180T175;NEG_M206T208	C05853+C00156+C05332+C00180+C00755+C00811+C00079+C00423+C00805+C05607+C00082+C03519
Metabolism	Global and overview maps	2-Oxocarboxylic acid metabolism	13	48	0.0182447	0.168256	ko01210	POS_M132T212;POS_M132T234;POS_M146T74;POS_M147T76;POS_M148T88;POS_M150T145;POS_M166T344;NEG_M132T82;NEG_M159T105;NEG_M175T99;NEG_M180T175;NEG_M192T75;NEG_M203T374	C00407+C00123+C00026+C00047+C00025+C00073+C00079+C00049+C00322+C02504+C00082+C00158+C00078
Metabolism	Metabolism of other amino acids	Glutathione metabolism	6	16	0.0218577	0.181419	ko00480	POS_M89T75;POS_M146T431;POS_M148T88;POS_M308T146;NEG_M128T92;NEG_M173T94	C00134+C00315+C00025+C00051+C01879+C05422
Metabolism	Amino acid metabolism	Lysine degradation	8	26	0.0291542	0.219981	ko00310	POS_M85T96;POS_M116T94;POS_M130T86;POS_M130T121;POS_M147T76;POS_M188T98;POS_M219T357;NEG_M159T105	C00164+C03273+C00408+C00408+C00047+C05548+C04020+C00322
Metabolism	Metabolism of cofactors and vitamins	Ubiquinone and other terpenoid-quinone biosynthesis	6	18	0.0392082	0.27119	ko00130	POS_M121T415;POS_M165T208;POS_M183T207;POS_M424T768;NEG_M129T89;NEG_M180T175	C00156+C00811+C03672+C14153+C00423+C00082
Metabolism	Metabolism of cofactors and vitamins	Nicotinate and nicotinamide metabolism	7	23	0.0429132	0.273984	ko00760	POS_M104T90;POS_M124T98;POS_M168T347;POS_M238T98;POS_M256T98;NEG_M132T82;NEG_M138T607	C00334+C00253+C03722+C03150+C05841+C00049+C01020
Metabolism	Metabolism of other amino acids	Cyanoamino acid metabolism	6	19	0.0504426	0.299052	ko00460	POS_M132T212;POS_M166T344;NEG_M89T79_1;NEG_M131T87;NEG_M132T82;NEG_M180T175	C00407+C00079+C01401+C00152+C00049+C00082
Metabolism	Carbohydrate metabolism	C5-Branched dibasic acid metabolism	5	15	0.0586912	0.307963	ko00660	POS_M146T74;POS_M147T158;POS_M148T73;POS_M148T88;POS_M157T126	C00026+C06030+C02614+C00025+C02341
Metabolism	Energy metabolism	Nitrogen metabolism	2	3	0.0595895	0.307963	ko00910	POS_M148T88;NEG_M145T90	C00025+C00064
Metabolism	Biosynthesis of other secondary metabolites	Tropane, piperidine and pyridine alkaloid biosynthesis	9	35	0.0630768	0.307963	ko00960	POS_M86T233;POS_M89T75;POS_M124T98;POS_M130T86;POS_M130T121;POS_M132T212;POS_M147T76;POS_M166T344;NEG_M165T359_3	C01746+C00134+C00253+C00408+C00408+C00407+C00047+C00079+C05607
Metabolism	Biosynthesis of other secondary metabolites	Indole alkaloid biosynthesis	4	11	0.066803	0.308036	ko00901	POS_M284T136;POS_M810T814_1;NEG_M203T374;NEG_M805T592	C07576+C07201+C00078+C07204
Metabolism	Amino acid metabolism	Histidine metabolism	7	26	0.0781483	0.341385	ko00340	POS_M112T75;POS_M146T74;POS_M148T88;POS_M156T74_2;NEG_M132T82;NEG_M154T94;NEG_M207T208	C00388+C00026+C00025+C03680+C00049+C00135+C00386
Metabolism	Biosynthesis of other secondary metabolites	Anthocyanin biosynthesis	4	12	0.0889468	0.369129	ko00942	POS_M566T478_2;POS_M595T492;POS_M612T491_2;NEG_M478T531	C20489+C08725+C16315+C12139
Metabolism	Amino acid metabolism	Arginine biosynthesis	5	17	0.0944859	0.373444	ko00220	POS_M146T74;POS_M148T88;NEG_M132T82;NEG_M145T90;NEG_M173T90	C00026+C00025+C00049+C00064+C00062
Metabolism	Metabolism of other amino acids	Taurine and hypotaurine metabolism	3	8	0.10249	0.386666	ko00430	POS_M140T830;POS_M146T74;POS_M148T88	C00227+C00026+C00025
Metabolism	Amino acid metabolism	Phenylalanine, tyrosine and tryptophan biosynthesis	6	23	0.113239	0.394717	ko00400	POS_M118T485;POS_M166T344;NEG_M153T442;NEG_M180T175;NEG_M191T84;NEG_M203T374	C00463+C00079+C00230+C00082+C00296+C00078
Metabolism	Amino acid metabolism	Valine, leucine and isoleucine degradation	4	13	0.114135	0.394717	ko00280	POS_M85T96;POS_M132T212;POS_M132T234;NEG_M103T93	C00164+C00407+C00123+C06001
Metabolism	Global and overview maps	Biosynthesis of secondary metabolites	60	357	0.128235	0.425741	ko01110	POS_M89T75;POS_M112T75;POS_M118T485;POS_M121T415;POS_M123T208;POS_M124T98;POS_M130T86;POS_M130T121;POS_M132T212;POS_M132T234;POS_M146T74;POS_M146T399;POS_M147T76;POS_M148T88;POS_M150T145;POS_M153T324;POS_M153T530;POS_M165T208;POS_M166T344;POS_M183T207;POS_M209T660;POS_M226T694;POS_M256T164;POS_M275T792;POS_M277T826;POS_M279T750;POS_M284T136;POS_M293T774;POS_M315T599;POS_M336T612;POS_M341T600;POS_…	C00134+C00388+C00463+C00156+C00180+C00253+C00408+C00408+C00407+C00123+C00026+C00966+C00047+C00025+C00073+C00385+C00755+C00811+C00079+C03672+C05610+C00931+C16702+C06535+C16300+C06427+C07576+C16321+C05202+C00757+C04118+C21191+C15783+C14153+C05623+C05625+C07201+C00258+C00423+C00152+C00049+C00149+C00805+C05608+C00418+C00230+C00135+C00062+C02504+C12205+C00082+C01752+C00158+C01494+C00257+C00078+C00864+…
Metabolism	Global and overview maps	Biosynthesis of amino acids	17	90	0.168	0.529183	ko01230	POS_M132T212;POS_M132T234;POS_M146T74;POS_M147T76;POS_M148T88;POS_M150T145;POS_M166T344;NEG_M131T87;NEG_M132T82;NEG_M145T90;NEG_M154T94;NEG_M159T105;NEG_M173T90;NEG_M175T99;NEG_M180T175;NEG_M192T75;NEG_M203T374	C00407+C00123+C00026+C00047+C00025+C00073+C00079+C00152+C00049+C00064+C00135+C00322+C00062+C02504+C00082+C00158+C00078
Metabolism	Nucleotide metabolism	Pyrimidine metabolism	8	37	0.172144	0.529183	ko00240	POS_M113T198;POS_M127T342;POS_M128T74;POS_M142T74_1;POS_M176T146;NEG_M103T80;NEG_M145T90;NEG_M243T211	C00106+C00178+C00813+C05281+C00438+C00383+C00064+C00299
Metabolism	Lipid metabolism	Linoleic acid metabolism	5	21	0.191143	0.56634	ko00591	POS_M295T817;POS_M313T784;NEG_M295T824;NEG_M313T732;NEG_M313T661	C04717+C14827+C14762+C14829+C14828
Metabolism	Carbohydrate metabolism	Glyoxylate and dicarboxylate metabolism	6	27	0.202099	0.56634	ko00630	POS_M146T74;POS_M148T88;NEG_M105T84;NEG_M133T78_2;NEG_M145T90;NEG_M192T75	C00026+C00025+C00258+C00149+C00064+C00158
Metabolism	Carbohydrate metabolism	Pyruvate metabolism	4	16	0.204701	0.56634	ko00620	POS_M140T830;POS_M379T511;NEG_M133T78_2;NEG_M175T99	C00227+C03451+C00149+C02504
Metabolism	Lipid metabolism	alpha-Linolenic acid metabolism	3	11	0.216817	0.569202	ko00592	POS_M277T826;POS_M279T750;POS_M293T774	C16300+C06427+C16321
Metabolism	Carbohydrate metabolism	Ascorbate and aldarate metabolism	5	22	0.219451	0.569202	ko00053	POS_M130T74;POS_M146T74;NEG_M129T100;NEG_M173T94;NEG_M209T77	C00433+C00026+C00684+C05422+C00879
Metabolism	Metabolism of cofactors and vitamins	Pantothenate and CoA biosynthesis	4	17	0.238614	0.600149	ko00770	POS_M113T198;POS_M146T399;NEG_M132T82;NEG_M218T192	C00106+C00966+C00049+C00864
Metabolism	Carbohydrate metabolism	Butanoate metabolism	4	18	0.273718	0.627801	ko00650	POS_M85T96;POS_M104T90;POS_M146T74;POS_M148T88	C00164+C00334+C00026+C00025
Metabolism	Lipid metabolism	Synthesis and degradation of ketone bodies	1	2	0.275522	0.627801	ko00072	POS_M85T96	C00164
Metabolism	Lipid metabolism	Cutin, suberine and wax biosynthesis	2	7	0.279863	0.627801	ko00073	NEG_M272T830;NEG_M285T743	C18218+C19615
Metabolism	Lipid metabolism	Sphingolipid metabolism	2	7	0.279863	0.627801	ko00600	POS_M142T34;POS_M318T776	C00346+C12144
Metabolism	Global and overview maps	Metabolic pathways	95	614	0.303335	0.662547	ko01100	POS_M85T96;POS_M89T75;POS_M104T90;POS_M104T101;POS_M112T75;POS_M113T198;POS_M118T485;POS_M121T415;POS_M121T309;POS_M122T289;POS_M123T208;POS_M124T98;POS_M127T342;POS_M130T74;POS_M130T86;POS_M130T121;POS_M131T84;POS_M132T212;POS_M132T234;POS_M140T830;POS_M142T34;POS_M143T96;POS_M146T74;POS_M146T399;POS_M146T431;POS_M147T76;POS_M148T73;POS_M148T88;POS_M150T145;POS_M153T324;POS_M153T530;POS_M156T74_…	C00164+C00134+C00334+C00114+C00388+C00106+C00463+C00156+C06758+C06757+C00180+C00253+C00178+C00433+C00408+C00408+C00179+C00407+C00123+C00227+C00346+C06231+C00026+C00966+C00315+C00047+C02614+C00025+C00073+C00385+C00755+C03680+C00811+C00079+C03722+C00438+C01061+C05610+C00978+C00931+C03150+C15650+C05841+C00212+C00468+C06427+C00387+C04717+C00051+C14827+C05202+C12144+C00185+C01137+C01847+C05623+C05625+…
Metabolism	Carbohydrate metabolism	Pentose and glucuronate interconversions	4	20	0.345963	0.73628	ko00040	POS_M130T74;POS_M146T74;NEG_M149T91;NEG_M151T93	C00433+C00026+C00181+C01904
Metabolism	Amino acid metabolism	Tyrosine metabolism	10	58	0.357576	0.74197	ko00350	POS_M85T96;POS_M121T229;POS_M152T289;POS_M165T208;POS_M166T336;POS_M183T207;POS_M201T402;NEG_M180T175;NEG_M299T545;NEG_M359T541	C00164+C06044+C02442+C00811+C06199+C03672+C01061+C00082+C06046+C01850
Metabolism	Global and overview maps	Carbon metabolism	8	46	0.37472	0.757846	ko01200	POS_M140T830;POS_M146T74;POS_M148T88;NEG_M105T84;NEG_M132T82;NEG_M133T78_2;NEG_M192T75;NEG_M196T83	C00227+C00026+C00025+C00258+C00049+C00149+C00158+C00257
Metabolism	Biosynthesis of other secondary metabolites	Benzoxazinoid biosynthesis	1	3	0.383488	0.757846	ko00402	POS_M118T485	C00463
Metabolism	Amino acid metabolism	Arginine and proline metabolism	8	48	0.423715	0.806335	ko00330	POS_M89T75;POS_M104T90;POS_M130T74;POS_M131T84;POS_M146T431;POS_M148T88;POS_M356T367;NEG_M173T90	C00134+C00334+C00433+C00179+C00315+C00025+C01137+C00062
Metabolism	Nucleotide metabolism	Purine metabolism	7	42	0.436849	0.806335	ko00230	POS_M126T345;POS_M133T123;POS_M153T324;POS_M268T275;POS_M284T298;NEG_M134T293;NEG_M145T90	C04051+C00802+C00385+C00212+C00387+C00147+C00064
Metabolism	Amino acid metabolism	Tryptophan metabolism	7	43	0.462985	0.806335	ko00380	POS_M118T485;POS_M168T347;POS_M218T485;NEG_M152T699;NEG_M159T105;NEG_M164T363;NEG_M203T374	C00463+C03722+C00978+C00632+C00322+C05653+C00078
Metabolism	Carbohydrate metabolism	Citrate cycle (TCA cycle)	3	17	0.475216	0.806335	ko00020	POS_M146T74;NEG_M133T78_2;NEG_M192T75	C00026+C00149+C00158
Metabolism	Amino acid metabolism	Valine, leucine and isoleucine biosynthesis	3	17	0.475216	0.806335	ko00290	POS_M132T212;POS_M132T234;NEG_M175T99	C00407+C00123+C02504
Metabolism	Metabolism of other amino acids	D-Arginine and D-ornithine metabolism	1	4	0.475442	0.806335	ko00472	NEG_M173T90	C00062
Metabolism	Global and overview maps	Degradation of aromatic compounds	8	51	0.496529	0.806335	ko01220	POS_M121T415;POS_M121T309;POS_M122T289;POS_M123T208;POS_M165T208;NEG_M129T89;NEG_M137T379;NEG_M153T442	C00156+C06758+C06757+C00180+C00811+C00423+C00805+C00230
Metabolism	Energy metabolism	Carbon fixation in photosynthetic organisms	2	11	0.503914	0.806335	ko00710	NEG_M132T82;NEG_M133T78_2	C00049+C00149
Metabolism	Biosynthesis of other secondary metabolites	Isoquinoline alkaloid biosynthesis	6	38	0.507573	0.806335	ko00950	POS_M165T208;POS_M256T164;POS_M315T599;POS_M336T612;POS_M341T600;NEG_M180T175	C00811+C16702+C05202+C00757+C04118+C00082
Metabolism	Biosynthesis of other secondary metabolites	Monobactam biosynthesis	3	18	0.515516	0.806335	ko00261	NEG_M132T82;NEG_M173T90;NEG_M180T175	C00049+C00062+C00082
Metabolism	Amino acid metabolism	Lysine biosynthesis	4	25	0.523343	0.806335	ko00300	POS_M146T74;POS_M147T76;NEG_M132T82;NEG_M159T105	C00026+C00047+C00049+C00322
Metabolism	Lipid metabolism	Glycerophospholipid metabolism	2	12	0.552809	0.806335	ko00564	POS_M104T101;POS_M142T34	C00114+C00346
Metabolism	Metabolism of cofactors and vitamins	Folate biosynthesis	2	12	0.552809	0.806335	ko00790	POS_M121T415;NEG_M255T398	C00156+C04874
Metabolism	Lipid metabolism	Glycerolipid metabolism	1	5	0.553748	0.806335	ko00561	NEG_M105T84	C00258
Metabolism	Metabolism of terpenoids and polyketides	Sesquiterpenoid and triterpenoid biosynthesis	1	5	0.553748	0.806335	ko00909	NEG_M517T467	C07667
Metabolism	Global and overview maps	Biosynthesis of antibiotics	27	186	0.597141	0.85453	ko01130	POS_M89T75;POS_M132T212;POS_M146T74;POS_M147T76;POS_M148T88;POS_M166T344;POS_M183T538;POS_M221T362;POS_M307T399;POS_M329T623;POS_M331T666;POS_M353T404;POS_M395T485;POS_M552T659;NEG_M105T84;NEG_M132T82;NEG_M133T78_2;NEG_M137T379;NEG_M147T99;NEG_M153T442;NEG_M159T105;NEG_M173T90;NEG_M180T175;NEG_M192T75;NEG_M196T83;NEG_M203T374;NEG_M315T519	C00134+C00407+C00026+C00047+C00025+C00079+C21087+C01298+C21255+C16755+C16754+C06686+C12369+C12476+C00258+C00049+C00149+C00805+C00418+C00230+C00322+C00062+C00082+C00158+C00257+C00078+C06681
Metabolism	Biosynthesis of other secondary metabolites	Carbapenem biosynthesis	1	6	0.620421	0.872795	ko00332	POS_M148T88	C00025
Metabolism	Metabolism of cofactors and vitamins	Porphyrin and chlorophyll metabolism	2	14	0.640104	0.885477	ko00860	POS_M148T88;POS_M226T694	C00025+C00931
Metabolism	Global and overview maps	Microbial metabolism in diverse environments	34	239	0.657836	0.892158	ko01120	POS_M85T96;POS_M97T96;POS_M104T90;POS_M110T74;POS_M116T94;POS_M121T415;POS_M121T309;POS_M122T289;POS_M123T208;POS_M124T98;POS_M133T123;POS_M140T830;POS_M143T96;POS_M146T74;POS_M147T76;POS_M148T88;POS_M153T324;POS_M153T530;POS_M174T74_1;POS_M201T402;POS_M226T694;NEG_M105T84;NEG_M129T89;NEG_M132T82;NEG_M133T78_2;NEG_M137T379;NEG_M138T607;NEG_M145T90;NEG_M152T699;NEG_M153T442;NEG_M159T105;NEG_M192T7…	C00164+C14279+C00334+C14450+C03273+C00156+C06758+C06757+C00180+C00253+C00802+C00227+C06231+C00026+C00047+C00025+C00385+C00755+C06333+C01061+C00931+C00258+C00423+C00049+C00149+C00805+C01020+C00064+C00632+C00230+C00322+C00158+C00257+C01227
Metabolism	Biosynthesis of other secondary metabolites	Betalain biosynthesis	1	7	0.67718	0.892158	ko00965	NEG_M180T175	C00082
Environmental Information Processing	Signal transduction	Plant hormone signal transduction	1	7	0.67718	0.892158	ko04075	NEG_M137T379	C00805
Metabolism	Amino acid metabolism	Cysteine and methionine metabolism	5	38	0.689765	0.892237	ko00270	POS_M150T145;POS_M242T74;POS_M308T146;POS_M356T367;NEG_M132T82	C00073+C15650+C00051+C01137+C00049
Metabolism	Amino acid metabolism	Glycine, serine and threonine metabolism	5	39	0.712556	0.892237	ko00260	POS_M104T101;POS_M143T96;NEG_M105T84;NEG_M132T82;NEG_M203T374	C00114+C06231+C00258+C00049+C00078
Metabolism	Metabolism of cofactors and vitamins	Biotin metabolism	1	8	0.725493	0.892237	ko00780	POS_M147T76	C00047
Metabolism	Metabolism of terpenoids and polyketides	Terpenoid backbone biosynthesis	1	8	0.725493	0.892237	ko00900	NEG_M147T99	C00418
Metabolism	Lipid metabolism	Fatty acid biosynthesis	1	9	0.766611	0.892237	ko00061	NEG_M265T777	C01530
Metabolism	Lipid metabolism	Steroid biosynthesis	1	9	0.766611	0.892237	ko00100	POS_M393T816	C15783
Metabolism	Carbohydrate metabolism	Starch and sucrose metabolism	1	9	0.766611	0.892237	ko00500	POS_M325T96	C00185
Metabolism	Carbohydrate metabolism	Pentose phosphate pathway	2	18	0.773988	0.892237	ko00030	NEG_M105T84;NEG_M196T83	C00258+C00257
Metabolism	Carbohydrate metabolism	Galactose metabolism	2	18	0.773988	0.892237	ko00052	NEG_M342T99;NEG_M503T99	C05402+C00492
Metabolism	Metabolism of cofactors and vitamins	Riboflavin metabolism	1	10	0.801599	0.911408	ko00740	POS_M441T401_2	C01847
Metabolism	Lipid metabolism	Biosynthesis of unsaturated fatty acids	2	20	0.823078	0.920047	ko01040	POS_M279T750;NEG_M265T777	C06427+C01530
Metabolism	Metabolism of cofactors and vitamins	Thiamine metabolism	1	11	0.831368	0.920047	ko00730	NEG_M180T175	C00082
Metabolism	Carbohydrate metabolism	Propanoate metabolism	1	12	0.856692	0.929625	ko00640	POS_M85T96	C00164
Metabolism	Biosynthesis of other secondary metabolites	Isoflavonoid biosynthesis	2	22	0.862423	0.929625	ko00943	POS_M417T660;POS_M433T500_1	C10216+C09126
Metabolism	Biosynthesis of other secondary metabolites	Caffeine metabolism	1	14	0.896548	0.946328	ko00232	POS_M153T324	C00385
Metabolism	Carbohydrate metabolism	Fructose and mannose metabolism	1	15	0.912123	0.946328	ko00051	NEG_M163T97	C00392
Metabolism	Metabolism of terpenoids and polyketides	Zeatin biosynthesis	1	15	0.912123	0.946328	ko00908	NEG_M134T293	C00147
Metabolism	Biosynthesis of other secondary metabolites	Flavonoid biosynthesis	2	35	0.976137	0.997667	ko00941	POS_M435T581;POS_M581T485	C09099+C09789
Metabolism	Carbohydrate metabolism	Amino sugar and nucleotide sugar metabolism	1	27	0.987745	0.997667	ko00520	NEG_M149T91	C00181
Metabolism	Lipid metabolism	Arachidonic acid metabolism	1	37	0.997667	0.997667	ko00590	POS_M309T754	C14794

## Sheet: Stem-vs-Leaf
KEGG_A_class	KEGG_B_class	Pathway	Stem-vs-Leaf (146)	All (1183)	Pvalue	Qvalue	Pathway ID	Metabolites	C_IDs
Genetic Information Processing	Translation	Aminoacyl-tRNA biosynthesis	12	24	5.87676e-06	0.000487771	ko00970	POS_M118T141;POS_M132T212;POS_M132T234;POS_M147T76;POS_M148T88;POS_M150T145;POS_M445T518;NEG_M131T87;NEG_M132T82;NEG_M145T90;NEG_M154T94;NEG_M173T90	C00183+C00407+C00123+C00047+C00025+C00073+C00101+C00152+C00049+C00064+C00135+C00062
Environmental Information Processing	Membrane transport	ABC transporters	20	62	1.82354e-05	0.000756767	ko02010	POS_M89T75;POS_M104T101;POS_M105T101;POS_M118T141;POS_M132T212;POS_M132T234;POS_M147T76;POS_M148T88;POS_M153T228;POS_M163T96;POS_M302T449;POS_M325T96;POS_M425T677;NEG_M132T82;NEG_M145T90;NEG_M149T91;NEG_M154T94;NEG_M173T90;NEG_M180T92;NEG_M342T99	C00134+C00114+C00114+C00183+C00407+C00123+C00047+C00025+C00379+C00031+C06687+C00185+C01674+C00049+C00064+C00181+C00135+C00062+C00137+C05402
Metabolism	Biosynthesis of other secondary metabolites	Flavone and flavonol biosynthesis	9	25	0.00185735	0.0513867	ko00944	POS_M315T669;POS_M595T515_2;POS_M611T491_2;NEG_M285T693;NEG_M299T723;NEG_M315T659;NEG_M317T423;NEG_M431T492_1;NEG_M610T485_3	C12633+C21833+C05625+C05903+C10098+C04443+C10107+C01714+C05625
Metabolism	Amino acid metabolism	Histidine metabolism	9	26	0.0025453	0.0528151	ko00340	POS_M112T75;POS_M141T498;POS_M146T74;POS_M148T88;POS_M152T322;POS_M155T86;POS_M156T74_2;NEG_M132T82;NEG_M154T94	C00388+C00860+C00026+C00025+C01152+C03277+C03680+C00049+C00135
Metabolism	Global and overview maps	2-Oxocarboxylic acid metabolism	13	48	0.00367841	0.0610615	ko01210	POS_M118T703_1;POS_M118T141;POS_M132T212;POS_M132T234;POS_M146T74;POS_M147T76;POS_M148T88;POS_M150T145;POS_M190T189;NEG_M101T92;NEG_M132T82;NEG_M175T99;NEG_M192T75	C03283+C00183+C00407+C00123+C00026+C00047+C00025+C00073+C00624+C00109+C00049+C02504+C00158
Metabolism	Carbohydrate metabolism	C5-Branched dibasic acid metabolism	6	15	0.0061769	0.0854472	ko00660	POS_M146T74;POS_M147T158;POS_M148T73;POS_M148T88;POS_M157T126;NEG_M101T92	C00026+C06030+C02614+C00025+C02341+C00109
Metabolism	Amino acid metabolism	Alanine, aspartate and glutamate metabolism	8	25	0.00763017	0.090472	ko00250	POS_M104T90;POS_M146T74;POS_M148T88;POS_M259T204;NEG_M131T87;NEG_M132T82;NEG_M145T90;NEG_M192T75	C00334+C00026+C00025+C00352+C00152+C00049+C00064+C00158
Metabolism	Metabolism of other amino acids	beta-Alanine metabolism	7	21	0.00980378	0.101714	ko00410	POS_M104T90;POS_M113T198;POS_M168T347;NEG_M89T92;NEG_M132T82;NEG_M154T94;NEG_M218T192	C00334+C00106+C03722+C00099+C00049+C00135+C00864
Metabolism	Amino acid metabolism	Arginine biosynthesis	6	17	0.0123685	0.114065	ko00220	POS_M146T74;POS_M148T88;POS_M190T189;NEG_M132T82;NEG_M145T90;NEG_M173T90	C00026+C00025+C00624+C00049+C00064+C00062
Metabolism	Biosynthesis of other secondary metabolites	Phenylpropanoid biosynthesis	10	40	0.019045	0.158074	ko00940	POS_M121T289;POS_M135T550_1;POS_M147T416;POS_M149T459_2;POS_M165T208;POS_M193T449;POS_M342T542;NEG_M129T89;NEG_M193T349;NEG_M312T599	C05627+C16930+C05851+C10452+C00811+C02325+C00761+C00423+C01494+C05855
Metabolism	Global and overview maps	Biosynthesis of amino acids	18	90	0.0209967	0.15843	ko01230	POS_M118T703_1;POS_M118T141;POS_M132T212;POS_M132T234;POS_M141T498;POS_M146T74;POS_M147T76;POS_M148T88;POS_M150T145;POS_M190T189;NEG_M101T92;NEG_M131T87;NEG_M132T82;NEG_M145T90;NEG_M154T94;NEG_M173T90;NEG_M175T99;NEG_M192T75	C03283+C00183+C00407+C00123+C00860+C00026+C00047+C00025+C00073+C00624+C00109+C00152+C00049+C00064+C00135+C00062+C02504+C00158
Metabolism	Energy metabolism	Nitrogen metabolism	2	3	0.0417273	0.266713	ko00910	POS_M148T88;NEG_M145T90	C00025+C00064
Metabolism	Amino acid metabolism	Glycine, serine and threonine metabolism	9	39	0.041889	0.266713	ko00260	POS_M104T101;POS_M105T101;POS_M118T703_1;POS_M445T518;NEG_M101T92;NEG_M105T84;NEG_M118T91;NEG_M130T79;NEG_M132T82	C00114+C00114+C03283+C00101+C00109+C00258+C05519+C00300+C00049
Metabolism	Amino acid metabolism	Valine, leucine and isoleucine biosynthesis	5	17	0.0482012	0.266713	ko00290	POS_M118T141;POS_M132T212;POS_M132T234;NEG_M101T92;NEG_M175T99	C00183+C00407+C00123+C00109+C02504
Metabolism	Metabolism of cofactors and vitamins	Pantothenate and CoA biosynthesis	5	17	0.0482012	0.266713	ko00770	POS_M113T198;POS_M118T141;NEG_M89T92;NEG_M132T82;NEG_M218T192	C00106+C00183+C00099+C00049+C00864
Metabolism	Nucleotide metabolism	Purine metabolism	9	42	0.0637955	0.318648	ko00230	POS_M133T123;POS_M152T98_1;POS_M268T275;POS_M284T298;POS_M348T270;NEG_M134T293;NEG_M145T90;NEG_M331T473;NEG_M346T310	C00802+C00242+C00212+C00387+C00020+C00147+C00064+C06196+C01367
Metabolism	Amino acid metabolism	Valine, leucine and isoleucine degradation	4	13	0.0652652	0.318648	ko00280	POS_M85T96;POS_M118T141;POS_M132T212;POS_M132T234	C00164+C00183+C00407+C00123
Metabolism	Metabolism of other amino acids	Cyanoamino acid metabolism	5	19	0.074008	0.33524	ko00460	POS_M118T141;POS_M132T212;NEG_M89T79_1;NEG_M131T87;NEG_M132T82	C00183+C00407+C01401+C00152+C00049
Environmental Information Processing	Signal transduction	Phosphatidylinositol signaling system	2	4	0.0767416	0.33524	ko04070	NEG_M180T92;NEG_M409T827	C00137+C00416
Metabolism	Biosynthesis of other secondary metabolites	Glucosinolate biosynthesis	4	14	0.0829019	0.338781	ko00966	POS_M118T141;POS_M132T212;POS_M132T234;POS_M150T145	C00183+C00407+C00123+C00073
Metabolism	Global and overview maps	Metabolic pathways	84	614	0.0857156	0.338781	ko01100	POS_M85T96;POS_M89T75;POS_M104T90;POS_M104T101;POS_M105T101;POS_M112T98;POS_M112T75;POS_M113T198;POS_M118T703_1;POS_M118T141;POS_M121T309;POS_M122T289;POS_M123T149;POS_M130T74;POS_M130T86;POS_M132T212;POS_M132T234;POS_M141T498;POS_M146T74;POS_M146T382;POS_M147T76;POS_M148T73;POS_M148T88;POS_M150T145;POS_M152T98_1;POS_M153T530;POS_M153T228;POS_M156T74_2;POS_M163T96;POS_M165T208;POS_M166T143;POS_M1…	C00164+C00134+C00334+C00114+C00114+C00380+C00388+C00106+C03283+C00183+C06758+C06757+C00153+C00433+C00408+C00407+C00123+C00860+C00026+C01035+C00047+C02614+C00025+C00073+C00242+C00755+C00379+C03680+C00031+C00811+C05589+C03722+C05587+C00624+C02325+C03740+C00268+C00475+C05841+C00352+C00212+C00387+C04717+C02934+C05202+C12144+C00185+C05954+C00020+C05956+C05552+C01674+C01847+C00101+C05625+C00099+C00109+…
Metabolism	Carbohydrate metabolism	Glyoxylate and dicarboxylate metabolism	6	27	0.10475	0.395194	ko00630	POS_M146T74;POS_M148T88;NEG_M105T84;NEG_M133T78_2;NEG_M145T90;NEG_M192T75	C00026+C00025+C00258+C00149+C00064+C00158
Metabolism	Lipid metabolism	Glycerolipid metabolism	2	5	0.117725	0.412594	ko00561	NEG_M105T84;NEG_M409T827	C00258+C00416
Human Diseases	Endocrine and metabolic diseases	AGE-RAGE signaling pathway in diabetic complications	1	1	0.123415	0.412594	ko04933	POS_M163T96	C00031
Metabolism	Metabolism of other amino acids	Glutathione metabolism	4	16	0.124275	0.412594	ko00480	POS_M89T75;POS_M148T88;POS_M219T142_1;NEG_M611T485_1	C00134+C00025+C03740+C00127
Metabolism	Metabolism of cofactors and vitamins	Nicotinate and nicotinamide metabolism	5	23	0.143677	0.457189	ko00760	POS_M104T90;POS_M123T149;POS_M168T347;POS_M256T98;NEG_M132T82	C00334+C00153+C03722+C05841+C00049
Metabolism	Nucleotide metabolism	Pyrimidine metabolism	7	37	0.161378	0.457189	ko00240	POS_M112T98;POS_M113T198;POS_M128T74;POS_M244T98;NEG_M89T92;NEG_M145T90;NEG_M214T394	C00380+C00106+C00813+C00475+C00099+C00064+C00672
Metabolism	Metabolism of cofactors and vitamins	Ubiquinone and other terpenoid-quinone biosynthesis	4	18	0.172645	0.457189	ko00130	POS_M165T208;POS_M183T207;NEG_M129T89;NEG_M163T419	C00811+C03672+C00423+C03672
Metabolism	Carbohydrate metabolism	Butanoate metabolism	4	18	0.172645	0.457189	ko00650	POS_M85T96;POS_M104T90;POS_M146T74;POS_M148T88	C00164+C00334+C00026+C00025
Metabolism	Lipid metabolism	Glycerophospholipid metabolism	3	12	0.176266	0.457189	ko00564	POS_M104T101;POS_M105T101;NEG_M409T827	C00114+C00114+C00416
Metabolism	Carbohydrate metabolism	Propanoate metabolism	3	12	0.176266	0.457189	ko00640	POS_M85T96;NEG_M89T92;NEG_M101T92	C00164+C00099+C00109
Metabolism	Metabolism of cofactors and vitamins	Folate biosynthesis	3	12	0.176266	0.457189	ko00790	POS_M239T321;POS_M254T204;POS_M445T518	C00268+C05926+C00101
Metabolism	Lipid metabolism	Sphingolipid metabolism	2	7	0.210052	0.528312	ko00600	POS_M300T783;POS_M318T776	C02934+C12144
Metabolism	Carbohydrate metabolism	Pentose and glucuronate interconversions	4	20	0.226372	0.536951	ko00040	POS_M130T74;POS_M146T74;POS_M153T228;NEG_M149T91	C00433+C00026+C00379+C00181
Metabolism	Lipid metabolism	Synthesis and degradation of ketone bodies	1	2	0.23169	0.536951	ko00072	POS_M85T96	C00164
Metabolism	Carbohydrate metabolism	Amino sugar and nucleotide sugar metabolism	5	27	0.232894	0.536951	ko00520	POS_M163T96;POS_M259T204;POS_M425T677;NEG_M149T91;NEG_M273T343	C00031+C00352+C01674+C00181+C04037
Metabolism	Metabolism of other amino acids	Taurine and hypotaurine metabolism	2	8	0.258538	0.550222	ko00430	POS_M146T74;POS_M148T88	C00026+C00025
Metabolism	Metabolism of cofactors and vitamins	Biotin metabolism	2	8	0.258538	0.550222	ko00780	POS_M147T76;POS_M355T494	C00047+C05552
Human Diseases	Endocrine and metabolic diseases	Insulin resistance	2	8	0.258538	0.550222	ko04931	POS_M163T96;POS_M259T204	C00031+C00352
Metabolism	Metabolism of terpenoids and polyketides	Zeatin biosynthesis	3	15	0.279482	0.560653	ko00908	POS_M348T270;NEG_M134T293;NEG_M218T91	C00020+C00147+C00371
Metabolism	Amino acid metabolism	Tyrosine metabolism	9	58	0.280452	0.560653	ko00350	POS_M85T96;POS_M121T229;POS_M152T289;POS_M165T208;POS_M166T143;POS_M168T322;POS_M183T207;NEG_M163T419;NEG_M167T528	C00164+C06044+C02442+C00811+C05589+C05587+C03672+C03672+C01161
Metabolism	Carbohydrate metabolism	Ascorbate and aldarate metabolism	4	22	0.283704	0.560653	ko00053	POS_M130T74;POS_M146T74;NEG_M129T100;NEG_M180T92	C00433+C00026+C00684+C00137
Metabolism	Carbohydrate metabolism	Starch and sucrose metabolism	2	9	0.30716	0.592891	ko00500	POS_M163T96;POS_M325T96	C00031+C00185
Metabolism	Global and overview maps	Carbon metabolism	7	46	0.336713	0.635163	ko01200	POS_M146T74;POS_M148T88;POS_M445T518;NEG_M105T84;NEG_M132T82;NEG_M133T78_2;NEG_M192T75	C00026+C00025+C00101+C00258+C00049+C00149+C00158
Metabolism	Carbohydrate metabolism	Citrate cycle (TCA cycle)	3	17	0.351217	0.647801	ko00020	POS_M146T74;NEG_M133T78_2;NEG_M192T75	C00026+C00149+C00158
Metabolism	Amino acid metabolism	Arginine and proline metabolism	7	48	0.379679	0.6672	ko00330	POS_M89T75;POS_M104T90;POS_M130T74;POS_M146T382;POS_M148T88;NEG_M130T79;NEG_M173T90	C00134+C00334+C00433+C01035+C00025+C00300+C00062
Metabolism	Carbohydrate metabolism	Pentose phosphate pathway	3	18	0.386932	0.6672	ko00030	POS_M163T96;NEG_M105T84;NEG_M214T394	C00031+C00258+C00672
Metabolism	Carbohydrate metabolism	Galactose metabolism	3	18	0.386932	0.6672	ko00052	POS_M163T96;NEG_M180T92;NEG_M342T99	C00031+C00137+C05402
Metabolism	Amino acid metabolism	Phenylalanine metabolism	6	41	0.394809	0.6672	ko00360	POS_M105T382;POS_M122T382;POS_M153T530;POS_M165T208;NEG_M129T89;NEG_M206T208	C05853+C05332+C00755+C00811+C00423+C03519
Metabolism	Energy metabolism	Carbon fixation in photosynthetic organisms	2	11	0.401928	0.6672	ko00710	NEG_M132T82;NEG_M133T78_2	C00049+C00149
Metabolism	Metabolism of other amino acids	D-Arginine and D-ornithine metabolism	1	4	0.409982	0.667226	ko00472	NEG_M173T90	C00062
Metabolism	Biosynthesis of other secondary metabolites	Tropane, piperidine and pyridine alkaloid biosynthesis	5	35	0.437871	0.696007	ko00960	POS_M86T233;POS_M89T75;POS_M130T86;POS_M132T212;POS_M147T76	C01746+C00134+C00408+C00407+C00047
Metabolism	Global and overview maps	Degradation of aromatic compounds	7	51	0.444438	0.696007	ko01220	POS_M121T309;POS_M122T289;POS_M165T208;NEG_M129T89;NEG_M153T442;NEG_M167T528;NEG_M172T292	C06758+C06757+C00811+C00423+C00230+C01161+C06677
Metabolism	Lipid metabolism	Biosynthesis of unsaturated fatty acids	3	20	0.456733	0.702016	ko01040	POS_M330T795;NEG_M265T777;NEG_M311T799	C16513+C01530+C06425
Metabolism	Metabolism of terpenoids and polyketides	Sesquiterpenoid and triterpenoid biosynthesis	1	5	0.483046	0.7141	ko00909	NEG_M311T416	C06080
Metabolism	Carbohydrate metabolism	Glycolysis / Gluconeogenesis	2	13	0.490241	0.7141	ko00010	POS_M163T96;NEG_M267T369	C00031+C01451
Metabolism	Lipid metabolism	Linoleic acid metabolism	3	21	0.490406	0.7141	ko00591	POS_M295T817;POS_M315T814;NEG_M295T824	C04717+C14829+C14762
Metabolism	Global and overview maps	Biosynthesis of antibiotics	23	186	0.53571	0.766619	ko01130	POS_M89T75;POS_M118T141;POS_M132T212;POS_M146T74;POS_M147T76;POS_M148T88;POS_M163T96;POS_M190T189;POS_M259T204;POS_M307T399;POS_M329T623;POS_M348T270;POS_M366T559;POS_M562T528;NEG_M101T92;NEG_M105T84;NEG_M132T82;NEG_M133T78_2;NEG_M153T442;NEG_M173T90;NEG_M180T92;NEG_M192T75;NEG_M333T544	C00134+C00183+C00407+C00026+C00047+C00025+C00031+C00624+C00352+C21255+C16755+C00020+C17582+C07030+C00109+C00258+C00049+C00149+C00230+C00062+C00137+C00158+C06686
Metabolism	Biosynthesis of other secondary metabolites	Carbapenem biosynthesis	1	6	0.547117	0.769673	ko00332	POS_M148T88	C00025
Metabolism	Carbohydrate metabolism	Inositol phosphate metabolism	1	7	0.603294	0.784798	ko00562	NEG_M180T92	C00137
Metabolism	Biosynthesis of other secondary metabolites	Betalain biosynthesis	1	7	0.603294	0.784798	ko00965	POS_M168T322	C05587
Environmental Information Processing	Signal transduction	Plant hormone signal transduction	1	7	0.603294	0.784798	ko04075	NEG_M218T91	C00371
Metabolism	Carbohydrate metabolism	Pyruvate metabolism	2	16	0.606384	0.784798	ko00620	NEG_M133T78_2;NEG_M175T99	C00149+C02504
Metabolism	Amino acid metabolism	Lysine biosynthesis	3	25	0.613655	0.784798	ko00300	POS_M146T74;POS_M147T76;NEG_M132T82	C00026+C00047+C00049
Metabolism	Global and overview maps	Biosynthesis of secondary metabolites	43	357	0.6146	0.784798	ko01110	POS_M89T75;POS_M112T75;POS_M118T141;POS_M130T86;POS_M132T212;POS_M132T234;POS_M141T498;POS_M146T74;POS_M147T416;POS_M147T76;POS_M148T88;POS_M150T145;POS_M153T530;POS_M163T96;POS_M165T208;POS_M183T207;POS_M190T189;POS_M193T449;POS_M315T599;POS_M341T600;POS_M348T270;POS_M595T515_2;POS_M611T491_2;NEG_M89T92;NEG_M101T92;NEG_M105T84;NEG_M129T89;NEG_M131T87;NEG_M132T82;NEG_M133T78_2;NEG_M153T442;NEG_M1…	C00134+C00388+C00183+C00408+C00407+C00123+C00860+C00026+C05851+C00047+C00025+C00073+C00755+C00031+C00811+C03672+C00624+C02325+C05202+C04118+C00020+C21833+C05625+C00099+C00109+C00258+C00423+C00152+C00049+C00149+C00230+C00135+C03672+C00062+C02504+C00158+C01494+C00371+C00864+C05903+C10107+C00416+C05625
Metabolism	Amino acid metabolism	Lysine degradation	3	26	0.641194	0.796489	ko00310	POS_M85T96;POS_M130T86;POS_M147T76	C00164+C00408+C00047
Metabolism	Biosynthesis of other secondary metabolites	Flavonoid biosynthesis	4	35	0.645363	0.796489	ko00941	POS_M435T491;POS_M581T485;NEG_M285T693;NEG_M317T423	C16492+C09789+C05903+C10107
Metabolism	Metabolism of cofactors and vitamins	One carbon pool by folate	1	8	0.652545	0.796489	ko00670	POS_M445T518	C00101
Metabolism	Biosynthesis of other secondary metabolites	Monobactam biosynthesis	2	18	0.67209	0.808456	ko00261	NEG_M132T82;NEG_M173T90	C00049+C00062
Metabolism	Lipid metabolism	Arachidonic acid metabolism	4	37	0.689816	0.813304	ko00590	POS_M335T818;POS_M335T826;POS_M351T718;POS_M352T677	C05954+C06315+C05956+C05960
Metabolism	Lipid metabolism	Fatty acid biosynthesis	1	9	0.695718	0.813304	ko00061	NEG_M265T777	C01530
Metabolism	Metabolism of cofactors and vitamins	Riboflavin metabolism	1	10	0.733559	0.834047	ko00740	POS_M441T401_2	C01847
Metabolism	Metabolism of terpenoids and polyketides	Carotenoid biosynthesis	1	10	0.733559	0.834047	ko00906	POS_M584T834_1	C08584
Metabolism	Biosynthesis of other secondary metabolites	Indole alkaloid biosynthesis	1	11	0.766722	0.859705	ko00901	POS_M163T96	C00031
Metabolism	Biosynthesis of other secondary metabolites	Isoflavonoid biosynthesis	2	22	0.776842	0.859705	ko00943	POS_M433T500_1;NEG_M397T600	C09126+C10216
Metabolism	Biosynthesis of other secondary metabolites	Anthocyanin biosynthesis	1	12	0.795782	0.860198	ko00942	POS_M612T491_2	C16315
Metabolism	Amino acid metabolism	Phenylalanine, tyrosine and tryptophan biosynthesis	2	23	0.798015	0.860198	ko00400	NEG_M153T442;NEG_M191T84	C00230+C00296
Metabolism	Global and overview maps	Microbial metabolism in diverse environments	26	239	0.809506	0.861397	ko01120	POS_M85T96;POS_M104T90;POS_M110T74;POS_M118T703_1;POS_M121T309;POS_M122T289;POS_M133T123;POS_M146T74;POS_M147T76;POS_M148T88;POS_M153T530;POS_M174T74_1;POS_M261T104;POS_M318T541;POS_M445T518;POS_M515T542_2;NEG_M105T84;NEG_M129T89;NEG_M132T82;NEG_M133T78_2;NEG_M145T90;NEG_M153T442;NEG_M167T528;NEG_M172T292;NEG_M180T92;NEG_M192T75	C00164+C00334+C14450+C03283+C06758+C06757+C00802+C00026+C00047+C00025+C00755+C06333+C18096+C01031+C00101+C19153+C00258+C00423+C00049+C00149+C00064+C00230+C01161+C06677+C00137+C00158
Metabolism	Metabolism of cofactors and vitamins	Porphyrin and chlorophyll metabolism	1	14	0.84355	0.878846	ko00860	POS_M148T88	C00025
Metabolism	Carbohydrate metabolism	Fructose and mannose metabolism	1	15	0.86309	0.878846	ko00051	POS_M261T104	C18096
Metabolism	Amino acid metabolism	Cysteine and methionine metabolism	3	38	0.868258	0.878846	ko00270	POS_M150T145;NEG_M101T92;NEG_M132T82	C00073+C00109+C00049
Metabolism	Biosynthesis of other secondary metabolites	Isoquinoline alkaloid biosynthesis	3	38	0.868258	0.878846	ko00950	POS_M165T208;POS_M315T599;POS_M341T600	C00811+C05202+C04118
Metabolism	Amino acid metabolism	Tryptophan metabolism	2	43	0.977295	0.977295	ko00380	POS_M168T347;NEG_M188T362	C03722+C01717

## Sheet: Stem-vs-Seed
KEGG_A_class	KEGG_B_class	Pathway	Stem-vs-Seed (171)	All (1183)	Pvalue	Qvalue	Pathway ID	Metabolites	C_IDs
Environmental Information Processing	Membrane transport	ABC transporters	21	62	6.05063e-05	0.00502203	ko02010	POS_M89T75;POS_M104T101;POS_M132T212;POS_M132T234;POS_M146T431;POS_M148T88;POS_M153T228;POS_M166T344;POS_M302T449;POS_M308T146;POS_M325T96;POS_M425T677;NEG_M145T90;NEG_M154T94;NEG_M173T90;NEG_M180T92;NEG_M323T380;NEG_M341T112;NEG_M342T99;NEG_M342T112;NEG_M503T99	C00134+C00114+C00407+C00123+C00315+C00025+C00379+C00079+C06687+C00051+C00185+C01674+C00064+C00135+C00062+C00137+C00243+C01083+C05402+C00089+C00492
Metabolism	Nucleotide metabolism	Purine metabolism	14	42	0.00134879	0.055975	ko00230	POS_M133T123;POS_M137T157;POS_M152T98_1;POS_M153T324;POS_M252T294;POS_M268T275;POS_M284T298;POS_M330T190;POS_M346T234;POS_M348T270;POS_M364T179;NEG_M134T293;NEG_M145T90;NEG_M331T473	C00802+C00262+C00242+C00385+C00559+C00212+C00387+C00575+C06194+C00020+C06193+C00147+C00064+C06196
Genetic Information Processing	Translation	Aminoacyl-tRNA biosynthesis	9	24	0.00415282	0.0879154	ko00970	POS_M132T212;POS_M132T234;POS_M148T88;POS_M150T145;POS_M166T344;NEG_M145T90;NEG_M154T94;NEG_M173T90;NEG_M203T374	C00407+C00123+C00025+C00073+C00079+C00064+C00135+C00062+C00078
Metabolism	Metabolism of other amino acids	Glutathione metabolism	7	16	0.00423689	0.0879154	ko00480	POS_M89T75;POS_M146T431;POS_M148T88;POS_M308T146;POS_M613T204_2;NEG_M128T92;NEG_M173T94	C00134+C00315+C00025+C00051+C00127+C01879+C05422
Metabolism	Amino acid metabolism	Lysine degradation	9	26	0.0076442	0.126894	ko00310	POS_M85T96;POS_M116T94;POS_M130T86;POS_M130T121;POS_M159T399;POS_M162T97;POS_M188T98;POS_M219T357;NEG_M159T105	C00164+C03273+C00408+C00408+C03087+C00956+C05548+C04020+C00322
Metabolism	Carbohydrate metabolism	C5-Branched dibasic acid metabolism	6	15	0.0135221	0.187056	ko00660	POS_M146T74;POS_M147T158;POS_M148T73;POS_M148T88;POS_M157T126;NEG_M101T92	C00026+C06030+C02614+C00025+C02341+C00109
Metabolism	Carbohydrate metabolism	Starch and sucrose metabolism	4	9	0.0294295	0.348949	ko00500	POS_M325T96;NEG_M259T100;NEG_M341T112;NEG_M342T112	C00185+C00092+C01083+C00089
Metabolism	Global and overview maps	2-Oxocarboxylic acid metabolism	12	48	0.0342585	0.355432	ko01210	POS_M118T703_1;POS_M132T212;POS_M132T234;POS_M146T74;POS_M148T88;POS_M150T145;POS_M162T97;POS_M166T344;NEG_M101T92;NEG_M159T105;NEG_M192T75;NEG_M203T374	C03283+C00407+C00123+C00026+C00025+C00073+C00956+C00079+C00109+C00322+C00158+C00078
Metabolism	Biosynthesis of other secondary metabolites	Glucosinolate biosynthesis	5	14	0.0396551	0.365708	ko00966	POS_M132T212;POS_M132T234;POS_M150T145;POS_M166T344;NEG_M203T374	C00407+C00123+C00073+C00079+C00078
Metabolism	Biosynthesis of other secondary metabolites	Phenylpropanoid biosynthesis	10	40	0.0514682	0.425703	ko00940	POS_M121T289;POS_M135T550_1;POS_M146T431;POS_M166T344;POS_M193T449;POS_M342T542;NEG_M129T89;NEG_M191T537;NEG_M193T349;NEG_M312T599	C05627+C16930+C00315+C00079+C02325+C00761+C00423+C01752+C01494+C05855
Metabolism	Energy metabolism	Nitrogen metabolism	2	3	0.0564184	0.425703	ko00910	POS_M148T88;NEG_M145T90	C00025+C00064
Metabolism	Amino acid metabolism	Histidine metabolism	7	26	0.0687111	0.436079	ko00340	POS_M112T75;POS_M146T74;POS_M148T88;POS_M152T322;POS_M155T86;POS_M156T74_2;NEG_M154T94	C00388+C00026+C00025+C01152+C03277+C03680+C00135
Metabolism	Metabolism of other amino acids	beta-Alanine metabolism	6	21	0.0696875	0.436079	ko00410	POS_M146T431;POS_M217T329;NEG_M89T92;NEG_M103T80;NEG_M154T94;NEG_M218T192	C00315+C05341+C00099+C00383+C00135+C00864
Metabolism	Nucleotide metabolism	Pyrimidine metabolism	9	37	0.0735555	0.436079	ko00240	POS_M112T98;POS_M127T342;POS_M128T74;POS_M142T74_1;POS_M244T98;POS_M324T142;NEG_M89T92;NEG_M103T80;NEG_M145T90	C00380+C00178+C00813+C05281+C00475+C00055+C00099+C00383+C00064
Metabolism	Amino acid metabolism	Arginine biosynthesis	5	17	0.0854889	0.459099	ko00220	POS_M146T74;POS_M148T88;NEG_M145T90;NEG_M173T90;NEG_M289T540	C00026+C00025+C00064+C00062+C03406
Metabolism	Global and overview maps	Metabolic pathways	97	614	0.0997688	0.459099	ko01100	POS_M85T96;POS_M89T75;POS_M104T101;POS_M112T98;POS_M112T75;POS_M118T703_1;POS_M121T415;POS_M121T309;POS_M122T289;POS_M124T98;POS_M127T342;POS_M130T74;POS_M130T86;POS_M130T121;POS_M131T84;POS_M132T212;POS_M132T234;POS_M137T157;POS_M143T96;POS_M146T74;POS_M146T399;POS_M146T431;POS_M148T73;POS_M148T88;POS_M150T145;POS_M152T98_1;POS_M153T324;POS_M153T530;POS_M153T228;POS_M156T74_2;POS_M162T97;POS_M16…	C00164+C00134+C00114+C00380+C00388+C03283+C00156+C06758+C06757+C00253+C00178+C00433+C00408+C00408+C00179+C00407+C00123+C00262+C06231+C00026+C00966+C00315+C02614+C00025+C00073+C00242+C00385+C00755+C00379+C03680+C00956+C00079+C05587+C02325+C01061+C00978+C04556+C03150+C15650+C00475+C00559+C05841+C00352+C00212+C00468+C06427+C00387+C00051+C14827+C05202+C12144+C00055+C00185+C05954+C00020+C05956+C01137+…
Environmental Information Processing	Signal transduction	Phosphatidylinositol signaling system	2	4	0.102208	0.459099	ko04070	NEG_M180T92;NEG_M409T827	C00137+C00416
Metabolism	Amino acid metabolism	Valine, leucine and isoleucine degradation	4	13	0.104987	0.459099	ko00280	POS_M85T96;POS_M132T212;POS_M132T234;NEG_M103T93	C00164+C00407+C00123+C06001
Metabolism	Carbohydrate metabolism	Galactose metabolism	5	18	0.105095	0.459099	ko00052	NEG_M180T92;NEG_M323T380;NEG_M342T99;NEG_M342T112;NEG_M503T99	C00137+C00243+C05402+C00089+C00492
Metabolism	Biosynthesis of other secondary metabolites	Tropane, piperidine and pyridine alkaloid biosynthesis	8	35	0.119626	0.492367	ko00960	POS_M86T233;POS_M89T75;POS_M124T98;POS_M130T86;POS_M130T121;POS_M132T212;POS_M166T344;NEG_M165T359_3	C01746+C00134+C00253+C00408+C00408+C00407+C00079+C05607
Metabolism	Amino acid metabolism	Phenylalanine metabolism	9	41	0.124575	0.492367	ko00360	POS_M105T382;POS_M121T415;POS_M122T382;POS_M153T530;POS_M166T344;NEG_M129T89;NEG_M137T379;NEG_M165T359_3;NEG_M206T208	C05853+C00156+C05332+C00755+C00079+C00423+C00805+C05607+C03519
Metabolism	Amino acid metabolism	Alanine, aspartate and glutamate metabolism	6	25	0.1398	0.504496	ko00250	POS_M146T74;POS_M148T88;POS_M259T204;NEG_M145T90;NEG_M192T75;NEG_M289T540	C00026+C00025+C00352+C00064+C00158+C03406
Metabolism	Biosynthesis of other secondary metabolites	Flavone and flavonol biosynthesis	6	25	0.1398	0.504496	ko00944	POS_M465T506;POS_M565T478_2;POS_M595T476_1;NEG_M299T723;NEG_M431T492_1;NEG_M563T481_1	C05623+C04858+C04024+C10098+C01714+C04858
Metabolism	Lipid metabolism	Glycerolipid metabolism	2	5	0.154509	0.534343	ko00561	NEG_M105T84;NEG_M409T827	C00258+C00416
Metabolism	Carbohydrate metabolism	Glyoxylate and dicarboxylate metabolism	6	27	0.183766	0.610103	ko00630	POS_M146T74;POS_M148T88;NEG_M105T84;NEG_M133T78_2;NEG_M145T90;NEG_M192T75	C00026+C00025+C00258+C00149+C00064+C00158
Metabolism	Global and overview maps	Biosynthesis of amino acids	16	90	0.214926	0.68611	ko01230	POS_M118T703_1;POS_M132T212;POS_M132T234;POS_M146T74;POS_M148T88;POS_M150T145;POS_M162T97;POS_M166T344;NEG_M101T92;NEG_M145T90;NEG_M154T94;NEG_M159T105;NEG_M173T90;NEG_M192T75;NEG_M203T374;NEG_M289T540	C03283+C00407+C00123+C00026+C00025+C00073+C00956+C00079+C00109+C00064+C00135+C00322+C00062+C00158+C00078+C03406
Metabolism	Carbohydrate metabolism	Propanoate metabolism	3	12	0.244985	0.695919	ko00640	POS_M85T96;NEG_M89T92;NEG_M101T92	C00164+C00099+C00109
Metabolism	Metabolism of cofactors and vitamins	Folate biosynthesis	3	12	0.244985	0.695919	ko00790	POS_M121T415;POS_M254T204;NEG_M255T398	C00156+C05926+C04874
Metabolism	Biosynthesis of other secondary metabolites	Anthocyanin biosynthesis	3	12	0.244985	0.695919	ko00942	POS_M566T478_2;POS_M595T492;NEG_M449T402_2	C20489+C08725+C08604
Metabolism	Lipid metabolism	Cutin, suberine and wax biosynthesis	2	7	0.268054	0.695919	ko00073	NEG_M272T830;NEG_M285T743	C18218+C19615
Metabolism	Carbohydrate metabolism	Inositol phosphate metabolism	2	7	0.268054	0.695919	ko00562	NEG_M180T92;NEG_M259T100	C00137+C00092
Metabolism	Lipid metabolism	Synthesis and degradation of ketone bodies	1	2	0.268306	0.695919	ko00072	POS_M85T96	C00164
Metabolism	Carbohydrate metabolism	Pentose and glucuronate interconversions	4	20	0.325374	0.758934	ko00040	POS_M130T74;POS_M146T74;POS_M153T228;NEG_M151T93	C00433+C00026+C00379+C01904
Metabolism	Metabolism of other amino acids	Taurine and hypotaurine metabolism	2	8	0.325545	0.758934	ko00430	POS_M146T74;POS_M148T88	C00026+C00025
Human Diseases	Endocrine and metabolic diseases	Insulin resistance	2	8	0.325545	0.758934	ko04931	POS_M259T204;NEG_M259T100	C00352+C00092
Metabolism	Amino acid metabolism	Glycine, serine and threonine metabolism	7	39	0.329176	0.758934	ko00260	POS_M104T101;POS_M118T703_1;POS_M143T96;NEG_M89T79_2;NEG_M101T92;NEG_M105T84;NEG_M203T374	C00114+C03283+C06231+C00213+C00109+C00258+C00078
Metabolism	Lipid metabolism	Linoleic acid metabolism	4	21	0.360676	0.809084	ko00591	POS_M313T784;NEG_M295T824;NEG_M313T732;NEG_M313T661	C14827+C14762+C14829+C14828
Metabolism	Amino acid metabolism	Arginine and proline metabolism	8	48	0.39033	0.842646	ko00330	POS_M89T75;POS_M130T74;POS_M131T84;POS_M146T431;POS_M148T88;POS_M356T367;NEG_M89T79_2;NEG_M173T90	C00134+C00433+C00179+C00315+C00025+C01137+C00213+C00062
Metabolism	Carbohydrate metabolism	Ascorbate and aldarate metabolism	4	22	0.395942	0.842646	ko00053	POS_M130T74;POS_M146T74;NEG_M173T94;NEG_M180T92	C00433+C00026+C05422+C00137
Metabolism	Amino acid metabolism	Phenylalanine, tyrosine and tryptophan biosynthesis	4	23	0.430903	0.857539	ko00400	POS_M166T344;NEG_M153T442;NEG_M191T84;NEG_M203T374	C00079+C00230+C00296+C00078
Metabolism	Metabolism of cofactors and vitamins	Nicotinate and nicotinamide metabolism	4	23	0.430903	0.857539	ko00760	POS_M124T98;POS_M238T98;POS_M256T98;NEG_M138T607	C00253+C03150+C05841+C01020
Metabolism	Carbohydrate metabolism	Citrate cycle (TCA cycle)	3	17	0.454953	0.857539	ko00020	POS_M146T74;NEG_M133T78_2;NEG_M192T75	C00026+C00149+C00158
Metabolism	Amino acid metabolism	Valine, leucine and isoleucine biosynthesis	3	17	0.454953	0.857539	ko00290	POS_M132T212;POS_M132T234;NEG_M101T92	C00407+C00123+C00109
Metabolism	Metabolism of cofactors and vitamins	Pantothenate and CoA biosynthesis	3	17	0.454953	0.857539	ko00770	POS_M146T399;NEG_M89T92;NEG_M218T192	C00966+C00099+C00864
Metabolism	Metabolism of other amino acids	D-Arginine and D-ornithine metabolism	1	4	0.464931	0.857539	ko00472	NEG_M173T90	C00062
Metabolism	Lipid metabolism	alpha-Linolenic acid metabolism	2	11	0.487497	0.873736	ko00592	POS_M279T750;POS_M293T774	C06427+C16321
Metabolism	Carbohydrate metabolism	Butanoate metabolism	3	18	0.494766	0.873736	ko00650	POS_M85T96;POS_M146T74;POS_M148T88	C00164+C00026+C00025
Metabolism	Metabolism of other amino acids	Cyanoamino acid metabolism	3	19	0.533097	0.907917	ko00460	POS_M132T212;POS_M166T344;NEG_M89T79_1	C00407+C00079+C01401
Metabolism	Lipid metabolism	Glycerophospholipid metabolism	2	12	0.535999	0.907917	ko00564	POS_M104T101;NEG_M409T827	C00114+C00416
Metabolism	Lipid metabolism	Biosynthesis of unsaturated fatty acids	3	20	0.569754	0.929988	ko01040	POS_M279T750;NEG_M265T777;NEG_M311T799	C06427+C01530+C06425
Metabolism	Biosynthesis of other secondary metabolites	Carbapenem biosynthesis	1	6	0.608942	0.929988	ko00332	POS_M148T88	C00025
Metabolism	Lipid metabolism	Arachidonic acid metabolism	5	37	0.638896	0.929988	ko00590	POS_M309T754;POS_M335T818;POS_M351T718;POS_M352T677;POS_M371T678	C14794+C05954+C05956+C05960+C05961
Metabolism	Global and overview maps	Microbial metabolism in diverse environments	33	239	0.658819	0.929988	ko01120	POS_M85T96;POS_M97T96;POS_M110T74;POS_M116T94;POS_M118T703_1;POS_M121T415;POS_M121T309;POS_M122T289;POS_M124T98;POS_M133T123;POS_M143T96;POS_M146T74;POS_M148T88;POS_M153T324;POS_M153T530;POS_M174T74_1;POS_M201T402;POS_M261T104;POS_M318T541;POS_M515T542_2;NEG_M105T84;NEG_M129T89;NEG_M133T78_2;NEG_M137T379;NEG_M138T607;NEG_M145T90;NEG_M152T699;NEG_M153T442;NEG_M159T105;NEG_M180T92;NEG_M192T75;NEG_M…	C00164+C14279+C14450+C03273+C03283+C00156+C06758+C06757+C00253+C00802+C06231+C00026+C00025+C00385+C00755+C06333+C01061+C18096+C01031+C19153+C00258+C00423+C00149+C00805+C01020+C00064+C00632+C00230+C00322+C00137+C00158+C00257+C01227
Metabolism	Metabolism of terpenoids and polyketides	Zeatin biosynthesis	2	15	0.661896	0.929988	ko00908	POS_M348T270;NEG_M134T293	C00020+C00147
Metabolism	Amino acid metabolism	Cysteine and methionine metabolism	5	38	0.66336	0.929988	ko00270	POS_M150T145;POS_M242T74;POS_M308T146;POS_M356T367;NEG_M101T92	C00073+C15650+C00051+C01137+C00109
Metabolism	Lipid metabolism	Sphingolipid metabolism	1	7	0.665757	0.929988	ko00600	POS_M318T776	C12144
Metabolism	Biosynthesis of other secondary metabolites	Betalain biosynthesis	1	7	0.665757	0.929988	ko00965	POS_M168T322	C05587
Environmental Information Processing	Signal transduction	Plant hormone signal transduction	1	7	0.665757	0.929988	ko04075	NEG_M137T379	C00805
Metabolism	Global and overview maps	Carbon metabolism	6	46	0.674944	0.929988	ko01200	POS_M146T74;POS_M148T88;NEG_M105T84;NEG_M133T78_2;NEG_M192T75;NEG_M196T83	C00026+C00025+C00258+C00149+C00158+C00257
Metabolism	Global and overview maps	Biosynthesis of antibiotics	25	186	0.701416	0.929988	ko01130	POS_M89T75;POS_M132T212;POS_M146T74;POS_M148T88;POS_M162T97;POS_M166T344;POS_M221T362;POS_M259T204;POS_M307T399;POS_M329T623;POS_M348T270;NEG_M101T92;NEG_M105T84;NEG_M133T78_2;NEG_M137T379;NEG_M153T442;NEG_M159T105;NEG_M173T90;NEG_M180T92;NEG_M192T75;NEG_M196T83;NEG_M203T374;NEG_M259T100;NEG_M289T540;NEG_M315T519	C00134+C00407+C00026+C00025+C00956+C00079+C01298+C00352+C21255+C16755+C00020+C00109+C00258+C00149+C00805+C00230+C00322+C00062+C00137+C00158+C00257+C00078+C00092+C03406+C06681
Metabolism	Metabolism of terpenoids and polyketides	Diterpenoid biosynthesis	1	8	0.714359	0.929988	ko00904	POS_M346T457	C01699
Metabolism	Amino acid metabolism	Lysine biosynthesis	3	25	0.724655	0.929988	ko00300	POS_M146T74;POS_M162T97;NEG_M159T105	C00026+C00956+C00322
Metabolism	Lipid metabolism	Fatty acid biosynthesis	1	9	0.755929	0.929988	ko00061	NEG_M265T777	C01530
Metabolism	Amino acid metabolism	Tyrosine metabolism	7	58	0.758231	0.929988	ko00350	POS_M85T96;POS_M121T229;POS_M152T289;POS_M166T336;POS_M168T322;POS_M201T402;NEG_M433T488_1	C00164+C06044+C02442+C06199+C05587+C01061+C01060
Metabolism	Carbohydrate metabolism	Pentose phosphate pathway	2	18	0.758997	0.929988	ko00030	NEG_M105T84;NEG_M196T83	C00258+C00257
Metabolism	Metabolism of cofactors and vitamins	Ubiquinone and other terpenoid-quinone biosynthesis	2	18	0.758997	0.929988	ko00130	POS_M121T415;NEG_M129T89	C00156+C00423
Metabolism	Amino acid metabolism	Tryptophan metabolism	5	43	0.769108	0.929988	ko00380	POS_M218T485;NEG_M152T699;NEG_M159T105;NEG_M164T363;NEG_M203T374	C00978+C00632+C00322+C05653+C00078
Metabolism	Global and overview maps	Degradation of aromatic compounds	6	51	0.771134	0.929988	ko01220	POS_M121T415;POS_M121T309;POS_M122T289;NEG_M129T89;NEG_M137T379;NEG_M153T442	C00156+C06758+C06757+C00423+C00805+C00230
Metabolism	Carbohydrate metabolism	Amino sugar and nucleotide sugar metabolism	3	27	0.773123	0.929988	ko00520	POS_M259T204;POS_M425T677;NEG_M273T343	C00352+C01674+C04037
Metabolism	Energy metabolism	Carbon fixation in photosynthetic organisms	1	11	0.821877	0.947442	ko00710	NEG_M133T78_2	C00149
Metabolism	Metabolism of cofactors and vitamins	Thiamine metabolism	1	11	0.821877	0.947442	ko00730	POS_M219T204	C04556
Metabolism	Biosynthesis of other secondary metabolites	Indole alkaloid biosynthesis	1	11	0.821877	0.947442	ko00901	NEG_M203T374	C00078
Metabolism	Biosynthesis of other secondary metabolites	Stilbenoid, diarylheptanoid and gingerol biosynthesis	1	12	0.847866	0.953924	ko00945	POS_M227T99	C05901
Metabolism	Biosynthesis of other secondary metabolites	Isoflavonoid biosynthesis	2	22	0.850486	0.953924	ko00943	POS_M433T500_1;POS_M446T475	C09126+C10538
Metabolism	Carbohydrate metabolism	Glycolysis / Gluconeogenesis	1	13	0.870082	0.958348	ko00010	NEG_M267T369	C01451
Metabolism	Biosynthesis of other secondary metabolites	Caffeine metabolism	1	14	0.88907	0.958348	ko00232	POS_M153T324	C00385
Metabolism	Metabolism of cofactors and vitamins	Porphyrin and chlorophyll metabolism	1	14	0.88907	0.958348	ko00860	POS_M148T88	C00025
Metabolism	Carbohydrate metabolism	Fructose and mannose metabolism	1	15	0.905297	0.963329	ko00051	POS_M261T104	C18096
Metabolism	Carbohydrate metabolism	Pyruvate metabolism	1	16	0.919162	0.96412	ko00620	NEG_M133T78_2	C00149
Metabolism	Global and overview maps	Biosynthesis of secondary metabolites	44	357	0.929272	0.96412	ko01110	POS_M89T75;POS_M112T75;POS_M121T415;POS_M124T98;POS_M130T86;POS_M130T121;POS_M132T212;POS_M132T234;POS_M146T74;POS_M146T399;POS_M148T88;POS_M150T145;POS_M153T324;POS_M153T530;POS_M162T97;POS_M166T344;POS_M193T449;POS_M227T99;POS_M256T164;POS_M275T792;POS_M279T750;POS_M293T774;POS_M315T599;POS_M346T457;POS_M348T270;POS_M465T506;NEG_M89T92;NEG_M101T92;NEG_M105T84;NEG_M129T89;NEG_M133T78_2;NEG_M137T…	C00134+C00388+C00156+C00253+C00408+C00408+C00407+C00123+C00026+C00966+C00025+C00073+C00385+C00755+C00956+C00079+C02325+C05901+C16702+C06535+C06427+C16321+C05202+C01699+C00020+C05623+C00099+C00109+C00258+C00423+C00149+C00805+C00230+C00135+C00062+C01752+C00158+C01494+C00257+C00078+C00864+C03406+C01083+C00416
Metabolism	Biosynthesis of other secondary metabolites	Monobactam biosynthesis	1	18	0.941125	0.964363	ko00261	NEG_M173T90	C00062
Metabolism	Biosynthesis of other secondary metabolites	Isoquinoline alkaloid biosynthesis	2	38	0.981664	0.993636	ko00950	POS_M256T164;POS_M315T599	C16702+C05202
Metabolism	Biosynthesis of other secondary metabolites	Flavonoid biosynthesis	1	35	0.996117	0.996117	ko00941	POS_M435T491	C16492

## Sheet: Leaf-vs-Seed
KEGG_A_class	KEGG_B_class	Pathway	Leaf-vs-Seed (199)	All (1183)	Pvalue	Qvalue	Pathway ID	Metabolites	C_IDs
Metabolism	Metabolism of other amino acids	beta-Alanine metabolism	10	21	0.000932071	0.0439354	ko00410	POS_M104T90;POS_M113T198;POS_M146T431;POS_M168T347;POS_M217T329;NEG_M89T92;NEG_M103T80;NEG_M132T82;NEG_M154T94;NEG_M218T192	C00334+C00106+C00315+C03722+C05341+C00099+C00383+C00049+C00135+C00864
Metabolism	Carbohydrate metabolism	Starch and sucrose metabolism	6	9	0.00113554	0.0439354	ko00500	POS_M163T96;POS_M325T96;POS_M325T137;NEG_M259T100;NEG_M341T112;NEG_M342T112	C00031+C00185+C00208+C00092+C01083+C00089
Environmental Information Processing	Membrane transport	ABC transporters	20	62	0.00162652	0.0439354	ko02010	POS_M89T75;POS_M104T101;POS_M132T212;POS_M132T234;POS_M146T431;POS_M163T96;POS_M166T344;POS_M308T146;POS_M325T96;POS_M325T137;POS_M425T677;NEG_M132T82;NEG_M145T90;NEG_M154T94;NEG_M180T92;NEG_M323T380;NEG_M341T112;NEG_M342T99;NEG_M342T112;NEG_M503T99	C00134+C00114+C00407+C00123+C00315+C00031+C00079+C00051+C00185+C00208+C01674+C00049+C00064+C00135+C00137+C00243+C01083+C05402+C00089+C00492
Metabolism	Metabolism of other amino acids	Glutathione metabolism	8	16	0.00211737	0.0439354	ko00480	POS_M89T75;POS_M146T431;POS_M219T142_1;POS_M308T146;POS_M613T204_2;NEG_M128T92;NEG_M173T94;NEG_M611T485_1	C00134+C00315+C03740+C00051+C00127+C01879+C05422+C00127
Metabolism	Biosynthesis of other secondary metabolites	Flavone and flavonol biosynthesis	10	25	0.00462031	0.0766971	ko00944	POS_M315T669;POS_M565T478_2;POS_M595T476_1;POS_M611T491_2;NEG_M285T693;NEG_M315T659;NEG_M317T423;NEG_M431T492_1;NEG_M563T481_1;NEG_M610T485_3	C12633+C04858+C04024+C05625+C05903+C04443+C10107+C01714+C04858+C05625
Metabolism	Nucleotide metabolism	Purine metabolism	14	42	0.00597926	0.0827131	ko00230	POS_M133T123;POS_M137T157;POS_M152T98_1;POS_M153T324;POS_M252T294;POS_M268T275;POS_M284T298;POS_M330T190;POS_M346T234;POS_M348T270;POS_M364T179;NEG_M134T293;NEG_M145T90;NEG_M346T310	C00802+C00262+C00242+C00385+C00559+C00212+C00387+C00575+C06194+C00020+C06193+C00147+C00064+C01367
Genetic Information Processing	Translation	Aminoacyl-tRNA biosynthesis	9	24	0.0116571	0.13822	ko00970	POS_M132T212;POS_M132T234;POS_M150T145;POS_M166T344;NEG_M131T87;NEG_M132T82;NEG_M145T90;NEG_M154T94;NEG_M203T374	C00407+C00123+C00073+C00079+C00152+C00049+C00064+C00135+C00078
Metabolism	Amino acid metabolism	Lysine degradation	9	26	0.0204811	0.19482	ko00310	POS_M85T96;POS_M116T94;POS_M130T86;POS_M130T121;POS_M159T399;POS_M162T97;POS_M188T98;POS_M219T357;NEG_M159T105	C00164+C03273+C00408+C00408+C03087+C00956+C05548+C04020+C00322
Metabolism	Global and overview maps	2-Oxocarboxylic acid metabolism	14	48	0.0211251	0.19482	ko01210	POS_M132T212;POS_M132T234;POS_M146T74;POS_M150T145;POS_M162T97;POS_M166T344;POS_M189T150;POS_M190T189;NEG_M101T92;NEG_M132T82;NEG_M159T105;NEG_M175T99;NEG_M192T75;NEG_M203T374	C00407+C00123+C00026+C00073+C00956+C00079+C04002+C00624+C00109+C00049+C00322+C02504+C00158+C00078
Metabolism	Metabolism of cofactors and vitamins	Nicotinate and nicotinamide metabolism	8	23	0.0276694	0.229656	ko00760	POS_M104T90;POS_M123T149;POS_M124T98;POS_M168T347;POS_M238T98;POS_M256T98;NEG_M132T82;NEG_M138T607	C00334+C00153+C00253+C03722+C03150+C05841+C00049+C01020
Metabolism	Amino acid metabolism	Alanine, aspartate and glutamate metabolism	8	25	0.0451158	0.340419	ko00250	POS_M104T90;POS_M146T74;POS_M259T204;NEG_M131T87;NEG_M132T82;NEG_M145T90;NEG_M192T75;NEG_M289T540	C00334+C00026+C00352+C00152+C00049+C00064+C00158+C03406
Metabolism	Carbohydrate metabolism	Galactose metabolism	6	18	0.0662872	0.447828	ko00052	POS_M163T96;NEG_M180T92;NEG_M323T380;NEG_M342T99;NEG_M342T112;NEG_M503T99	C00031+C00137+C00243+C05402+C00089+C00492
Metabolism	Biosynthesis of other secondary metabolites	Glucosinolate biosynthesis	5	14	0.0701417	0.447828	ko00966	POS_M132T212;POS_M132T234;POS_M150T145;POS_M166T344;NEG_M203T374	C00407+C00123+C00073+C00079+C00078
Metabolism	Nucleotide metabolism	Pyrimidine metabolism	10	37	0.0772292	0.457859	ko00240	POS_M112T98;POS_M113T198;POS_M127T342;POS_M128T74;POS_M142T74_1;POS_M244T98;POS_M324T142;NEG_M89T92;NEG_M103T80;NEG_M145T90	C00380+C00106+C00178+C00813+C05281+C00475+C00055+C00099+C00383+C00064
Metabolism	Carbohydrate metabolism	C5-Branched dibasic acid metabolism	5	15	0.091358	0.504546	ko00660	POS_M146T74;POS_M147T158;POS_M148T73;POS_M157T126;NEG_M101T92	C00026+C06030+C02614+C02341+C00109
Metabolism	Lipid metabolism	alpha-Linolenic acid metabolism	4	11	0.0972618	0.504546	ko00592	POS_M277T826;POS_M279T750;POS_M293T774;NEG_M223T654	C16300+C06427+C16321+C11512
Metabolism	Biosynthesis of other secondary metabolites	Tropane, piperidine and pyridine alkaloid biosynthesis	9	35	0.118075	0.513533	ko00960	POS_M86T233;POS_M89T75;POS_M124T98;POS_M130T86;POS_M130T121;POS_M132T212;POS_M166T344;POS_M336T517;NEG_M165T359_3	C01746+C00134+C00253+C00408+C00408+C00407+C00079+C06176+C05607
Metabolism	Metabolism of cofactors and vitamins	Folate biosynthesis	4	12	0.127447	0.513533	ko00790	POS_M121T415;POS_M254T204;POS_M256T152;NEG_M255T398	C00156+C05926+C04874+C04874
Metabolism	Biosynthesis of other secondary metabolites	Anthocyanin biosynthesis	4	12	0.127447	0.513533	ko00942	POS_M566T478_2;POS_M595T492;POS_M612T491_2;NEG_M449T402_2	C20489+C08725+C16315+C08604
Environmental Information Processing	Signal transduction	Phosphatidylinositol signaling system	2	4	0.133809	0.513533	ko04070	NEG_M180T92;NEG_M409T827	C00137+C00416
Human Diseases	Endocrine and metabolic diseases	Insulin resistance	3	8	0.137105	0.513533	ko04931	POS_M163T96;POS_M259T204;NEG_M259T100	C00031+C00352+C00092
Metabolism	Amino acid metabolism	Arginine biosynthesis	5	17	0.142304	0.513533	ko00220	POS_M146T74;POS_M190T189;NEG_M132T82;NEG_M145T90;NEG_M289T540	C00026+C00624+C00049+C00064+C03406
Metabolism	Metabolism of cofactors and vitamins	Pantothenate and CoA biosynthesis	5	17	0.142304	0.513533	ko00770	POS_M113T198;POS_M146T399;NEG_M89T92;NEG_M132T82;NEG_M218T192	C00106+C00966+C00099+C00049+C00864
Metabolism	Carbohydrate metabolism	Ascorbate and aldarate metabolism	6	22	0.149876	0.51711	ko00053	POS_M130T74;POS_M146T74;NEG_M129T100;NEG_M173T94;NEG_M180T92;NEG_M209T77	C00433+C00026+C00684+C05422+C00137+C00879
Metabolism	Amino acid metabolism	Valine, leucine and isoleucine degradation	4	13	0.160991	0.51711	ko00280	POS_M85T96;POS_M132T212;POS_M132T234;NEG_M103T93	C00164+C00407+C00123+C06001
Metabolism	Global and overview maps	Metabolic pathways	110	614	0.166823	0.51711	ko01100	POS_M85T96;POS_M89T75;POS_M104T90;POS_M104T101;POS_M112T98;POS_M112T75;POS_M113T198;POS_M121T415;POS_M121T309;POS_M122T289;POS_M123T149;POS_M124T98;POS_M127T342;POS_M130T74;POS_M130T86;POS_M130T121;POS_M131T84;POS_M132T212;POS_M132T234;POS_M137T157;POS_M143T96;POS_M146T74;POS_M146T399;POS_M146T431;POS_M148T73;POS_M150T145;POS_M152T98_1;POS_M153T324;POS_M162T97;POS_M163T96;POS_M165T208;POS_M166T34…	C00164+C00134+C00334+C00114+C00380+C00388+C00106+C00156+C06758+C06757+C00153+C00253+C00178+C00433+C00408+C00408+C00179+C00407+C00123+C00262+C06231+C00026+C00966+C00315+C02614+C00073+C00242+C00385+C00956+C00031+C00811+C00079+C03722+C05587+C04002+C00624+C01061+C01112+C00978+C04556+C03740+C03150+C15650+C00475+C00559+C05841+C04874+C00352+C00212+C00468+C06427+C00387+C04717+C02934+C00051+C14827+C05202+…
Human Diseases	Endocrine and metabolic diseases	AGE-RAGE signaling pathway in diabetic complications	1	1	0.168216	0.51711	ko04933	POS_M163T96	C00031
Metabolism	Metabolism of other amino acids	Cyanoamino acid metabolism	5	19	0.202873	0.601373	ko00460	POS_M132T212;POS_M166T344;NEG_M89T79_1;NEG_M131T87;NEG_M132T82	C00407+C00079+C01401+C00152+C00049
Metabolism	Biosynthesis of other secondary metabolites	Phenylpropanoid biosynthesis	9	40	0.217442	0.622335	ko00940	POS_M121T289;POS_M146T431;POS_M147T416;POS_M165T208;POS_M166T344;POS_M342T542;NEG_M191T537;NEG_M193T349;NEG_M312T599	C05627+C00315+C05851+C00811+C00079+C00761+C01752+C01494+C05855
Metabolism	Global and overview maps	Biosynthesis of amino acids	18	90	0.239999	0.663997	ko01230	POS_M132T212;POS_M132T234;POS_M146T74;POS_M150T145;POS_M162T97;POS_M166T344;POS_M189T150;POS_M190T189;NEG_M101T92;NEG_M131T87;NEG_M132T82;NEG_M145T90;NEG_M154T94;NEG_M159T105;NEG_M175T99;NEG_M192T75;NEG_M203T374;NEG_M289T540	C00407+C00123+C00026+C00073+C00956+C00079+C04002+C00624+C00109+C00152+C00049+C00064+C00135+C00322+C02504+C00158+C00078+C03406
Metabolism	Amino acid metabolism	Histidine metabolism	6	26	0.263362	0.698594	ko00340	POS_M112T75;POS_M146T74;POS_M155T86;NEG_M132T82;NEG_M137T171;NEG_M154T94	C00388+C00026+C03277+C00049+C00785+C00135
Metabolism	Lipid metabolism	Linoleic acid metabolism	5	21	0.270388	0.698594	ko00591	POS_M295T817;POS_M313T784;NEG_M295T824;NEG_M313T732;NEG_M313T661	C04717+C14827+C14762+C14829+C14828
Metabolism	Biosynthesis of other secondary metabolites	Indole alkaloid biosynthesis	3	11	0.277754	0.698594	ko00901	POS_M163T96;POS_M284T136;NEG_M203T374	C00031+C07576+C00078
Metabolism	Lipid metabolism	Synthesis and degradation of ketone bodies	1	2	0.308254	0.712042	ko00072	POS_M85T96	C00164
Metabolism	Amino acid metabolism	Valine, leucine and isoleucine biosynthesis	4	17	0.317128	0.712042	ko00290	POS_M132T212;POS_M132T234;NEG_M101T92;NEG_M175T99	C00407+C00123+C00109+C02504
Metabolism	Carbohydrate metabolism	Propanoate metabolism	3	12	0.327857	0.712042	ko00640	POS_M85T96;NEG_M89T92;NEG_M101T92	C00164+C00099+C00109
Metabolism	Lipid metabolism	Cutin, suberine and wax biosynthesis	2	7	0.334574	0.712042	ko00073	NEG_M272T830;NEG_M285T743	C18218+C19615
Metabolism	Carbohydrate metabolism	Inositol phosphate metabolism	2	7	0.334574	0.712042	ko00562	NEG_M180T92;NEG_M259T100	C00137+C00092
Metabolism	Lipid metabolism	Sphingolipid metabolism	2	7	0.334574	0.712042	ko00600	POS_M300T783;POS_M318T776	C02934+C12144
Metabolism	Carbohydrate metabolism	Butanoate metabolism	4	18	0.358725	0.744354	ko00650	POS_M85T96;POS_M104T90;POS_M146T74;NEG_M85T79	C00164+C00334+C00026+C00741
Metabolism	Amino acid metabolism	Tyrosine metabolism	11	58	0.381794	0.757309	ko00350	POS_M85T96;POS_M121T229;POS_M152T289;POS_M165T208;POS_M166T336;POS_M168T322;POS_M183T207;POS_M201T402;NEG_M167T528;NEG_M299T545;NEG_M433T488_1	C00164+C06044+C02442+C00811+C06199+C05587+C03672+C01061+C01161+C06046+C01060
Metabolism	Amino acid metabolism	Phenylalanine metabolism	8	41	0.383217	0.757309	ko00360	POS_M105T382;POS_M121T415;POS_M122T382;POS_M165T208;POS_M166T344;NEG_M137T379;NEG_M165T359_3;NEG_M206T208	C05853+C00156+C05332+C00811+C00079+C00805+C05607+C03519
Metabolism	Amino acid metabolism	Lysine biosynthesis	5	25	0.414631	0.800335	ko00300	POS_M146T74;POS_M162T97;POS_M189T150;NEG_M132T82;NEG_M159T105	C00026+C00956+C04002+C00049+C00322
Metabolism	Energy metabolism	Nitrogen metabolism	1	3	0.424814	0.801354	ko00910	NEG_M145T90	C00064
Metabolism	Carbohydrate metabolism	Amino sugar and nucleotide sugar metabolism	5	27	0.486076	0.89654	ko00520	POS_M163T96;POS_M259T204;POS_M425T677;NEG_M273T343;NEG_M614T478_2	C00031+C00352+C01674+C04037+C00128
Metabolism	Carbohydrate metabolism	Pyruvate metabolism	3	16	0.520915	0.926436	ko00620	POS_M379T511;NEG_M133T78_2;NEG_M175T99	C03451+C00149+C02504
Metabolism	Amino acid metabolism	Phenylalanine, tyrosine and tryptophan biosynthesis	4	23	0.558292	0.926436	ko00400	POS_M166T344;NEG_M153T442;NEG_M191T84;NEG_M203T374	C00079+C00230+C00296+C00078
Metabolism	Carbohydrate metabolism	Citrate cycle (TCA cycle)	3	17	0.564584	0.926436	ko00020	POS_M146T74;NEG_M133T78_2;NEG_M192T75	C00026+C00149+C00158
Metabolism	Energy metabolism	Carbon fixation in photosynthetic organisms	2	11	0.575826	0.926436	ko00710	NEG_M132T82;NEG_M133T78_2	C00049+C00149
Metabolism	Lipid metabolism	Glycerolipid metabolism	1	5	0.602527	0.926436	ko00561	NEG_M409T827	C00416
Metabolism	Metabolism of terpenoids and polyketides	Sesquiterpenoid and triterpenoid biosynthesis	1	5	0.602527	0.926436	ko00909	NEG_M311T416	C06080
Metabolism	Amino acid metabolism	Tryptophan metabolism	7	43	0.604085	0.926436	ko00380	POS_M168T347;POS_M218T485;NEG_M152T699;NEG_M159T105;NEG_M164T363;NEG_M188T362;NEG_M203T374	C03722+C00978+C00632+C00322+C05653+C01717+C00078
Metabolism	Metabolism of cofactors and vitamins	Ubiquinone and other terpenoid-quinone biosynthesis	3	18	0.605756	0.926436	ko00130	POS_M121T415;POS_M165T208;POS_M183T207	C00156+C00811+C03672
Metabolism	Lipid metabolism	Glycerophospholipid metabolism	2	12	0.62542	0.926436	ko00564	POS_M104T101;NEG_M409T827	C00114+C00416
Metabolism	Amino acid metabolism	Cysteine and methionine metabolism	6	38	0.63766	0.926436	ko00270	POS_M150T145;POS_M242T74;POS_M308T146;POS_M356T367;NEG_M101T92;NEG_M132T82	C00073+C15650+C00051+C01137+C00109+C00049
Metabolism	Global and overview maps	Degradation of aromatic compounds	8	51	0.647696	0.926436	ko01220	POS_M121T415;POS_M121T309;POS_M122T289;POS_M165T208;NEG_M137T379;NEG_M153T442;NEG_M167T528;NEG_M172T292	C00156+C06758+C06757+C00811+C00805+C00230+C01161+C06677
Metabolism	Amino acid metabolism	Glycine, serine and threonine metabolism	6	39	0.664118	0.926436	ko00260	POS_M104T101;POS_M143T96;NEG_M89T79_2;NEG_M101T92;NEG_M132T82;NEG_M203T374	C00114+C06231+C00213+C00109+C00049+C00078
Metabolism	Carbohydrate metabolism	Glycolysis / Gluconeogenesis	2	13	0.670421	0.926436	ko00010	POS_M163T96;NEG_M267T369	C00031+C01451
Metabolism	Carbohydrate metabolism	Pentose and glucuronate interconversions	3	20	0.680089	0.926436	ko00040	POS_M130T74;POS_M146T74;NEG_M151T93	C00433+C00026+C01904
Metabolism	Lipid metabolism	Biosynthesis of unsaturated fatty acids	3	20	0.680089	0.926436	ko01040	POS_M279T750;NEG_M265T777;NEG_M311T799	C06427+C01530+C06425
Metabolism	Carbohydrate metabolism	Glyoxylate and dicarboxylate metabolism	4	27	0.69125	0.926436	ko00630	POS_M146T74;NEG_M133T78_2;NEG_M145T90;NEG_M192T75	C00026+C00149+C00064+C00158
Metabolism	Global and overview maps	Biosynthesis of antibiotics	29	186	0.720587	0.926436	ko01130	POS_M89T75;POS_M132T212;POS_M146T74;POS_M162T97;POS_M163T96;POS_M166T344;POS_M189T150;POS_M190T189;POS_M221T362;POS_M259T204;POS_M307T399;POS_M329T623;POS_M348T270;POS_M366T559;POS_M562T528;NEG_M101T92;NEG_M132T82;NEG_M133T78_2;NEG_M137T379;NEG_M153T442;NEG_M159T105;NEG_M180T92;NEG_M192T75;NEG_M196T83;NEG_M203T374;NEG_M259T100;NEG_M289T540;NEG_M315T519;NEG_M333T544	C00134+C00407+C00026+C00956+C00031+C00079+C04002+C00624+C01298+C00352+C21255+C16755+C00020+C17582+C07030+C00109+C00049+C00149+C00805+C00230+C00322+C00137+C00158+C00257+C00078+C00092+C03406+C06681+C06686
Metabolism	Amino acid metabolism	Arginine and proline metabolism	7	48	0.723712	0.926436	ko00330	POS_M89T75;POS_M104T90;POS_M130T74;POS_M131T84;POS_M146T431;POS_M356T367;NEG_M89T79_2	C00134+C00334+C00433+C00179+C00315+C01137+C00213
Metabolism	Biosynthesis of other secondary metabolites	Betalain biosynthesis	1	7	0.725522	0.926436	ko00965	POS_M168T322	C05587
Environmental Information Processing	Signal transduction	Plant hormone signal transduction	1	7	0.725522	0.926436	ko04075	NEG_M137T379	C00805
Metabolism	Metabolism of terpenoids and polyketides	Zeatin biosynthesis	2	15	0.747266	0.939744	ko00908	POS_M348T270;NEG_M134T293	C00020+C00147
Metabolism	Metabolism of other amino acids	Taurine and hypotaurine metabolism	1	8	0.771969	0.942256	ko00430	POS_M146T74	C00026
Metabolism	Metabolism of terpenoids and polyketides	Diterpenoid biosynthesis	1	8	0.771969	0.942256	ko00904	POS_M346T457	C01699
Metabolism	Lipid metabolism	Fatty acid biosynthesis	1	9	0.810589	0.975056	ko00061	NEG_M265T777	C01530
Metabolism	Carbohydrate metabolism	Pentose phosphate pathway	2	18	0.833585	0.98093	ko00030	POS_M163T96;NEG_M196T83	C00031+C00257
Metabolism	Metabolism of terpenoids and polyketides	Carotenoid biosynthesis	1	10	0.842695	0.98093	ko00906	POS_M584T834_1	C08584
Metabolism	Biosynthesis of other secondary metabolites	Flavonoid biosynthesis	4	35	0.866547	0.98093	ko00941	POS_M435T491;POS_M581T485;NEG_M285T693;NEG_M317T423	C16492+C09789+C05903+C10107
Metabolism	Metabolism of cofactors and vitamins	Thiamine metabolism	1	11	0.869382	0.98093	ko00730	POS_M219T204	C04556
Metabolism	Biosynthesis of other secondary metabolites	Stilbenoid, diarylheptanoid and gingerol biosynthesis	1	12	0.89156	0.98093	ko00945	POS_M227T99	C05901
Metabolism	Global and overview maps	Biosynthesis of secondary metabolites	53	357	0.900466	0.98093	ko01110	POS_M89T75;POS_M112T75;POS_M121T415;POS_M124T98;POS_M130T86;POS_M130T121;POS_M132T212;POS_M132T234;POS_M146T74;POS_M146T399;POS_M147T416;POS_M150T145;POS_M153T324;POS_M162T97;POS_M163T96;POS_M165T208;POS_M166T344;POS_M183T207;POS_M190T189;POS_M227T99;POS_M256T164;POS_M275T792;POS_M277T826;POS_M279T750;POS_M284T136;POS_M293T774;POS_M315T599;POS_M336T517;POS_M346T457;POS_M348T270;POS_M611T491_2;NEG…	C00134+C00388+C00156+C00253+C00408+C00408+C00407+C00123+C00026+C00966+C05851+C00073+C00385+C00956+C00031+C00811+C00079+C03672+C00624+C05901+C16702+C06535+C16300+C06427+C07576+C16321+C05202+C06176+C01699+C00020+C05625+C00099+C00109+C00152+C00049+C00149+C00805+C00230+C00135+C02504+C01752+C00158+C01494+C00257+C00078+C00864+C11512+C05903+C03406+C10107+C01083+C00416+C05625
Metabolism	Biosynthesis of other secondary metabolites	Isoquinoline alkaloid biosynthesis	4	38	0.905807	0.98093	ko00950	POS_M165T208;POS_M256T164;POS_M315T599;POS_M362T286	C00811+C16702+C05202+C06327
Metabolism	Global and overview maps	Carbon metabolism	5	46	0.910019	0.98093	ko01200	POS_M146T74;NEG_M132T82;NEG_M133T78_2;NEG_M192T75;NEG_M196T83	C00026+C00049+C00149+C00158+C00257
Metabolism	Biosynthesis of other secondary metabolites	Caffeine metabolism	1	14	0.925298	0.983295	ko00232	POS_M153T324	C00385
Metabolism	Carbohydrate metabolism	Fructose and mannose metabolism	1	15	0.938015	0.983295	ko00051	POS_M261T104	C18096
Metabolism	Lipid metabolism	Arachidonic acid metabolism	3	37	0.962946	0.983295	ko00590	POS_M309T754;POS_M352T677;POS_M371T678	C14794+C05960+C05961
Metabolism	Biosynthesis of other secondary metabolites	Monobactam biosynthesis	1	18	0.964624	0.983295	ko00261	NEG_M132T82	C00049
Metabolism	Global and overview maps	Microbial metabolism in diverse environments	31	239	0.972313	0.983295	ko01120	POS_M85T96;POS_M97T96;POS_M104T90;POS_M110T74;POS_M116T94;POS_M121T415;POS_M121T309;POS_M122T289;POS_M124T98;POS_M133T123;POS_M143T96;POS_M146T74;POS_M153T324;POS_M174T74_1;POS_M189T150;POS_M201T402;POS_M261T104;NEG_M132T82;NEG_M133T78_2;NEG_M137T379;NEG_M138T607;NEG_M145T90;NEG_M152T699;NEG_M153T442;NEG_M159T105;NEG_M167T528;NEG_M172T292;NEG_M180T92;NEG_M192T75;NEG_M196T83;NEG_M269T810	C00164+C14279+C00334+C14450+C03273+C00156+C06758+C06757+C00253+C00802+C06231+C00026+C00385+C06333+C04002+C01061+C18096+C00049+C00149+C00805+C01020+C00064+C00632+C00230+C00322+C01161+C06677+C00137+C00158+C00257+C01227
Metabolism	Biosynthesis of other secondary metabolites	Isoflavonoid biosynthesis	1	22	0.983295	0.983295	ko00943	POS_M433T500_1	C09126
